# Supplementary material for: The liverwort Pellia endiviifolia shares microtranscriptomic traits that are common to green algae and land plants
Source: PubMed Central journal article supplement (PMC4368373; doi:10.1111/nph.13220), 2014-12-19
Supplement: nph0206-0352-sd1.pdf [file nph0206-0352-sd1.pdf]

## ***New Phytologist* Supporting Information**

Article title:

**Liverwort *Pellia endiviifolia* shares microtranscriptomic traits that are common to green algae and land plants**

Authors:

Alaba S<sup>2§</sup>, Piszczalka P<sup>1§</sup>, Pietrykowska H<sup>1</sup>, Sulkowska A<sup>1</sup>, Pacak AM<sup>1</sup>, Sierocka I<sup>1</sup>, Nuc PW<sup>1</sup>, Singh K<sup>1</sup>, Plewka P<sup>1</sup>, Jarmolowski A<sup>1</sup>, Karlowski WM<sup>2\*</sup>, Szweykowska-Kulinska Z<sup>1,2\*</sup>

<sup>1</sup>Department of Gene Expression, Institute of Molecular Biology and Biotechnology, Faculty of Biology, Adam Mickiewicz University, 61-614 Poznań, Poland

<sup>2</sup>Bioinformatics Laboratory, Institute of Molecular Biology and Biotechnology, Faculty of Biology, Adam Mickiewicz University, 61-614 Poznań, Poland

\* Corresponding authors. <sup>§</sup>Both authors contributed equally to this work.

### **Supporting Information:**

#### **Methods S1**

**Fig. S1 Schematic evolutionary tree of Viridiplantae with marked evolutionary position of *P. endiviifolia*.**

**Fig. S2** Aniline blue staining for the presence of endophytic fungi in *P. endiviifolia* thalli cells.

**Fig. S3** Detection of endophytic fungi and algae in *P. endiviifolia* thalli that were grown in the natural habitat and *in vitro* using specific PCR primers.

**Fig. S4** Selected conservative miRNAs in the liverwort *P. endiviifolia* as detected by northern hybridization.

**Fig. S5** Distribution of the read length in each novel miRNA cluster.

**Fig. S6** Secondary structure predictions for the identified *P. endiviifolia* pre-miRNAs encoding conservative and novel miRNAs.

**Table S1** Oligonucleotides that were used in the experiments.

**Table S2** Best matches for the miRBase mature miRNAs that were found in *P. endiviifolia* sRNA-seq data (as separate Excel file).

**Table S3** 25 pri-miRNAs that were identified in the *P. endiviifolia* transcriptome.

**Table S4** High expression of pen-miR8162-5p:pen-miR8162-3p in all of the sRNA NGS datasets.

**Table S5** Target mRNAs of known miRNAs that were identified in *P. endiviifolia* and confirmed by degradome data.

**Table S6** Targets for novel miRNAs that were identified in *P. endiviifolia* and confirmed by degradome data.

## Methods S1

### RNA and DNA isolation

Total RNA for sRNA detection was isolated using a method that permits the enrichment of sRNAs (Kruszka *et al.*, 2013) with the following modifications: the precipitation was performed with 1.2 vol. of ethanol and 0.4 vol. of salt solution (0.8 M sodium citrate, 1.2 M NaCl). For cDNA, total RNA was isolated similarly, and RNA was precipitated only after chloroform extraction using 0.5 vol. of isopropanol and 0.5 vol. of salt solution (0.8 M sodium citrate, 1.2 M NaCl). The quantity and quality of RNA were measured using a NanoDrop ND-1000 spectrophotometer (NanoDrop Technologies, Wilmington, DE, USA), while the RNA quality was estimated using agarose gel electrophoresis.

Genomic DNA (gDNA) was isolated from the liverwort thalli that were grown *in vitro* using the DNeasy Plant Maxi Kit (Qiagen, Hilden, Germany). The concentration and quality of genomic DNA were estimated using a NanoDrop ND-1000 spectrophotometer and confirmed by electrophoresis on a 0.6% agarose/EtBr gel.

### pri-miRNA RACE experiments and genome walking

PCR and RT-PCR reactions, 5' and 3' RACE experiments for the identification of pri-miRNA structures and 5' and 3' genome walking analyses for the identification of *MIR* gene structures were performed as previously described (Sierocka *et al.*, 2011), with the exception of using Advantage® 2 Polymerase (Clontech Laboratories, Inc., Mountain View, CA, USA). The primer sequences that were used in the RACE and genome walking experiments and the primers that were used for the *MIR* gene amplification are shown in Table S1. The PCR products were separated on 1.2% agarose gels in 1× TBE buffer. The *MIR* gene structures were obtained by alignment of transcript and genomic sequences derived from RACE and genome walking experiment for each presented gene.

### Deep-sequencing and bioinformatic analyses

For the deep-sequencing analysis, RNA isolation was performed from different types of *P. endiviifolia* thalli as described in the Materials & Methods. Total RNA (10 µg) was mixed 1:1 (vol/vol) with loading buffer II (Ambion® Austin, TX, USA), denatured for 2 min at 90°C and size-fractionated by 15% denaturing polyacrylamide gel electrophoresis; then, the small RNA fragments of 15–30 nt were isolated from the gel and purified. To localize the small RNAs, a 10-

bp DNA ladder was used. An aliquot of 1  $\mu$ l of GlycoBlue Coprecipitant (15 mg/ $\mu$ l, Ambion® Austin, TX, USA) per sample was applied. The small RNA molecules were then ligated to a 5' adaptor and a 3' adaptor (Table S1) and converted to cDNA by RT-PCR following the protocol of Pant *et al.* (2009). The purified cDNA libraries were sequenced on the Illumina HiScanSQ platform using SR flow cell v1.5 (Illumina, Inc., San Diego, CA, USA). Each library was loaded onto a single lane in a flow cell. The adaptor sequences were identified and trimmed from each read using a customized Perl script. Reads in which the adaptor could not be identified were discarded. In this manner, low-quality reads were automatically rejected because no adapter sequence could be reliably identified. The sequencing reactions resulted in more than 14 million unique, quality-filtered and adaptor-trimmed reads. As expected for the sRNA sequencing procedure, the size distribution of the short sequences revealed the presence of a dominating class of 21-nt-long reads. Next, the BLASTn program was used to align the reads from each library to known plant mature miRNA sequences that permitted up to two mismatches to currently known plant miRNAs (Altschul *et al.*, 1997). The raw counts of reads for each library were recalculated into “reads per million” (RPM) using the total number of sequences matching miRNA. The 'mean count' for each sRNA sequence was calculated as the total number of normalized RPM counts from all of the libraries divided by the library number.

### **Degradome sequencing**

Approximately 200  $\mu$ g of total RNA was used for mRNA purification and degradome library construction. However, only female and male thalli growing *in vitro* and having no reproductive organs were used for total RNA isolation. Polyadenylated RNA was twice purified by hybridization with biotinylated oligo-dT 20-mers that were attached to streptavidin-coated magnetic beads (Dynal M-280) according to the manufacturer's instructions. The next steps of the degradome library preparation were performed as previously described (Addo-Quaye *et al.*, 2009; German *et al.*, 2009). Briefly, mRNA was ligated to an RNA oligonucleotide adaptor containing a 3' *EcoP15I* recognition site. The ligation products were used to generate first-strand cDNA by reverse transcription (RT). Then, a short PCR was used to amplify the cDNA to obtain sufficient quantities of DNA products. After digestion with *EcoP15I*, the 5'-ends of amplified ds-cDNA of 65-66 bp were ligated to a double-stranded DNA adaptor. The PAGE-purified ligation products were amplified using bar-coded primers to obtain final libraries that were compatible with the Illumina TruSeq system.

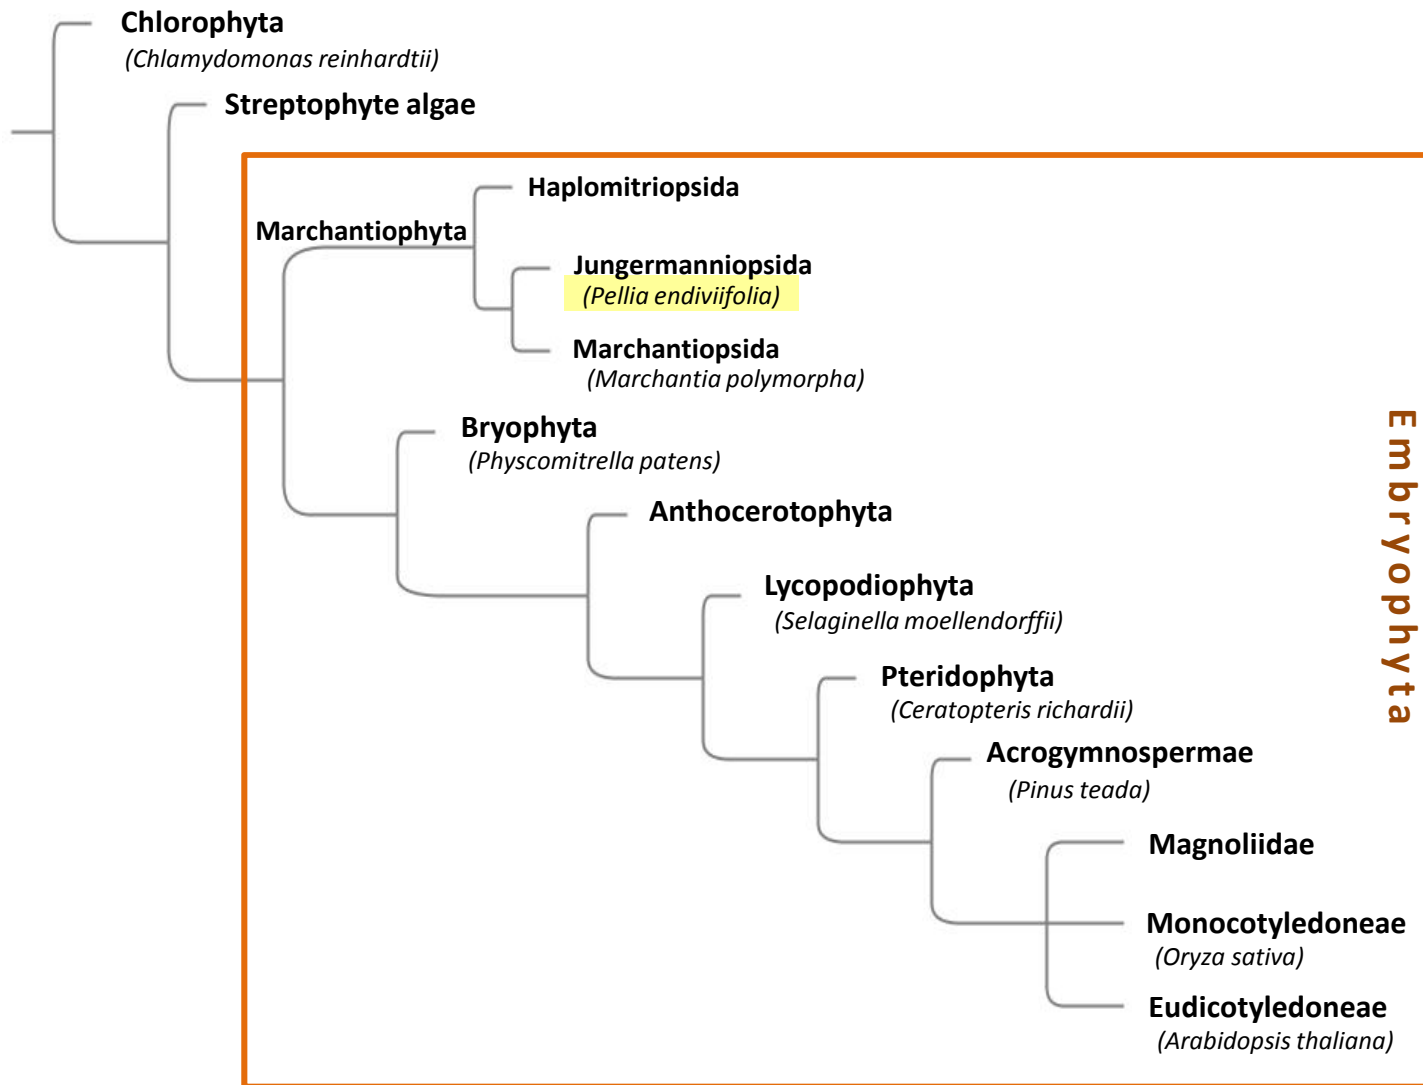

**Fig. S1 Schematic evolutionary tree of Viridiplantae with marked evolutionary position of *P. endiviifolia*.** A simplified summary of the phylogenetic relationships among the major lineages of the Viridiplantae based on the DNA sequence comparison of 360 plastid genomes, after Ruhfel *et al.* 2014. Model plant species in the main branches are shown.

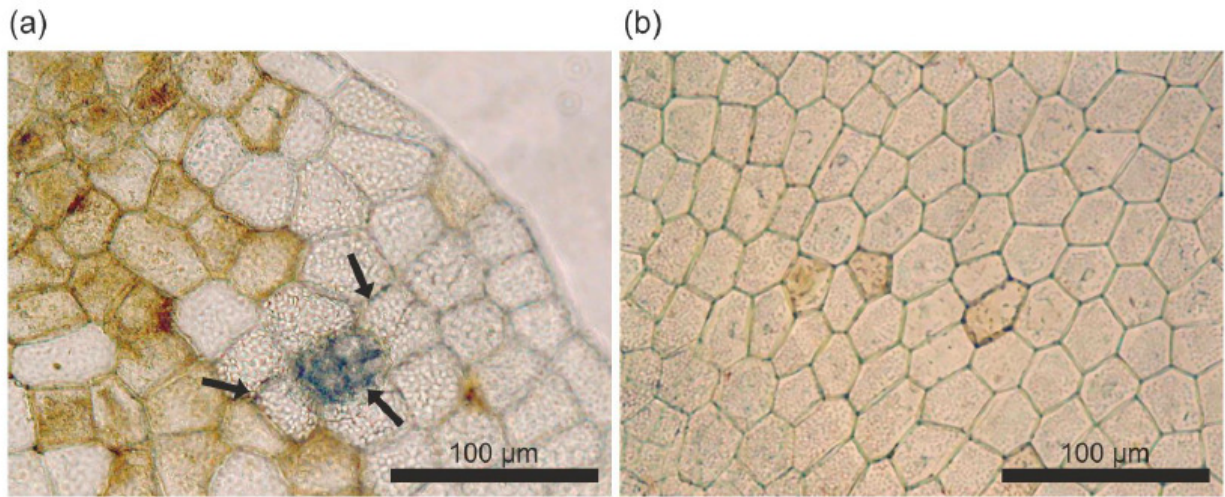

**Fig. S2 Aniline blue staining for the presence of endophytic fungi in *P. endiviifolia* thalli cells.** (a) Liverworts that were collected in the natural habitat and (b) liverworts that were grown *in vitro*. The arrows indicate fungal hyphae (Zeiss Axioskop 2 plus that was equipped with a Power Shot G5 Canon Digital Camera, 130×).

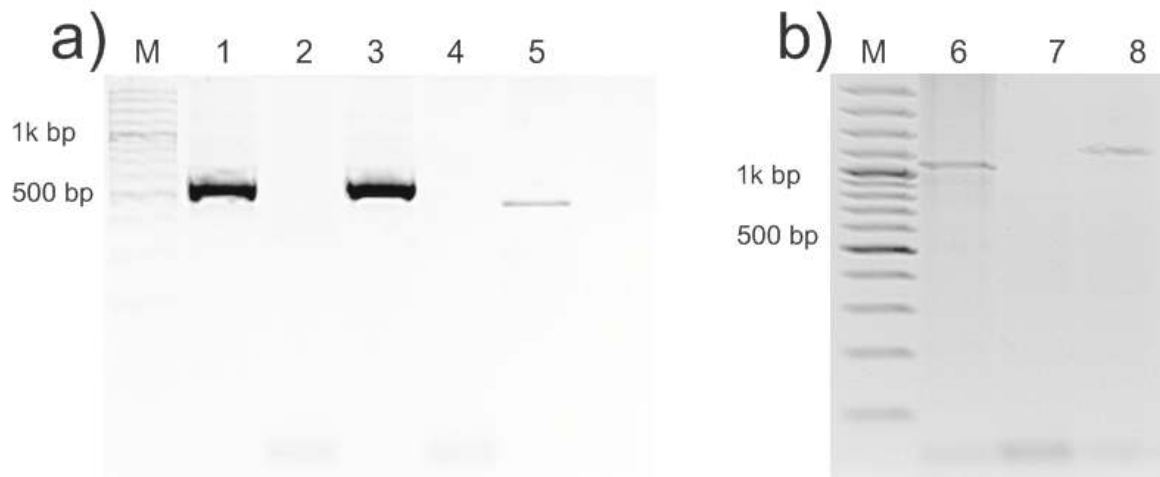

**Fig. S3 Detection of endophytic fungi and algae in *P. endiviifolia* thalli that were grown in the natural habitat and *in vitro* using specific PCR primers.** (a) Agarose gel electrophoresis of PCR products using DNA that was isolated from *P. endiviifolia* that was grown *in vitro* (lanes 1-4) and *in vivo* (lane 5). Lanes 1 and 3 represent the PCR products that were obtained using primers for 18S rDNA, which is universal for plants and fungi, while lanes 2, 4, and 5 show the PCR products that were obtained using another pair of primers that are specific for fungi 18S rDNA. (b) Agarose gel electrophoresis of the PCR products using DNA that was isolated from *P. endiviifolia* that was grown *in vitro* (lane 7) and *in vivo* (lane 8), and using DNA that was isolated from *C. reinhardtii* (lane 6). All PCR reactions were performed using the same pair of primers that are specific for *Chlorophyta*. M – 100 bp DNA ladder (Fermentas by Thermo Fisher Scientific Inc., Waltham, MA USA).

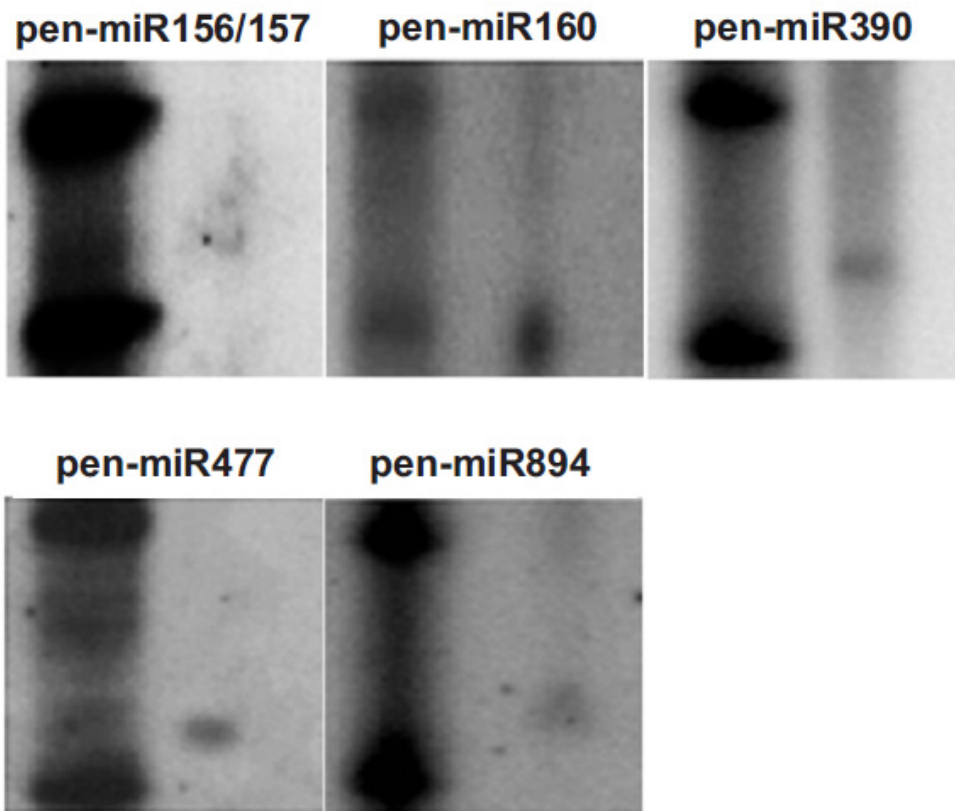

**Fig. S4 Selected conservative miRNAs in the liverwort *P. endiviifolia* as detected by northern hybridization.** Left side of the northern blots – RNA Decade molecular size marker including bands that are 30 nt and 20 nt long. Above the blots, the name of each miRNA is provided.

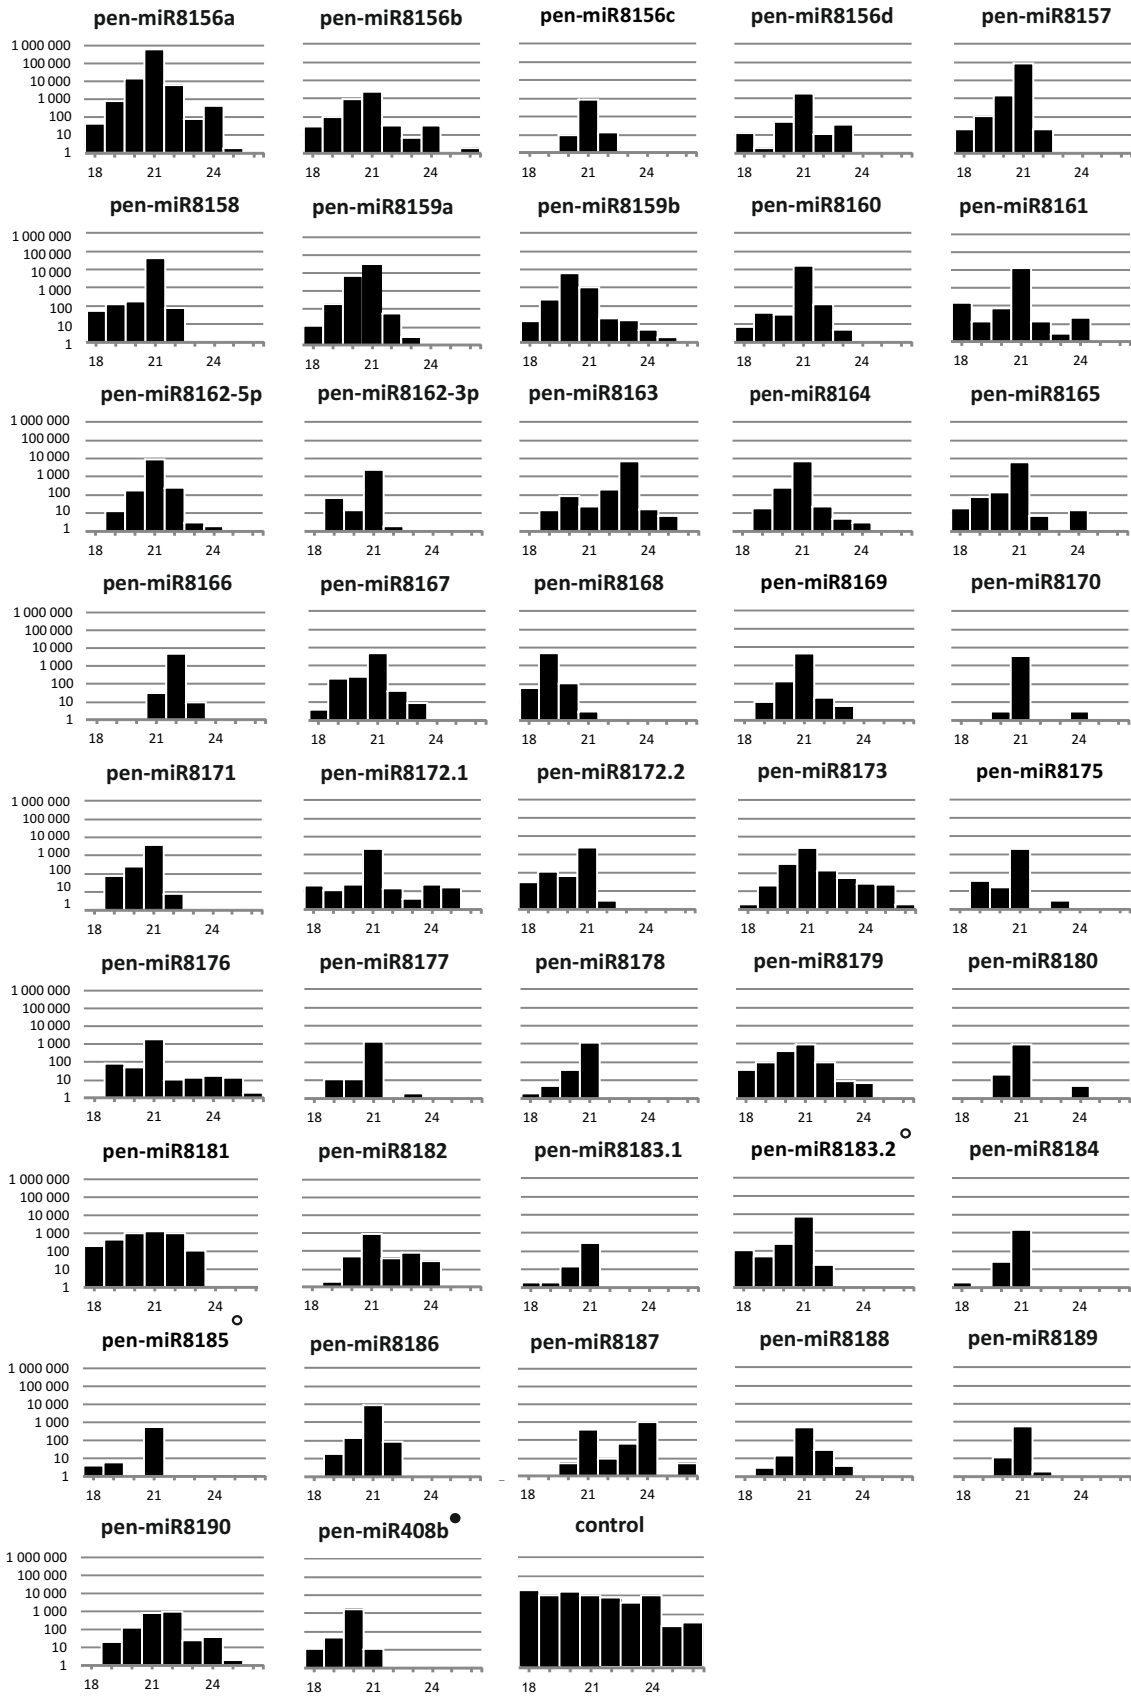



**Fig. S5 Distribution of the read length in each novel miRNA cluster.**

OY axis - mean counts; OX axis - the length of a given RNA fragment in each cluster (nt). In each cluster, there are dominating RNA species in a length range that is typical for miRNAs. The very last diagram shows the distribution length for a small RNA cluster in which no particular RNA fragment was dominant (control). ○ -sRNA homologs that were found in *C. reinhardtii* NGS data with 1 or 2 mismatches in the overlapping regions. ● depicts pen-miR408b\*. miR408b\* was originally identified as a novel miRNA and was then identified as an miR\* in the pre-miRNA408. The read counts represent a single NGS experiment.

**Fig. S6**

**Secondary structure predictions for the identified *P. endiviifolia* pre-miRNAs encoding conservative and novel miRNAs.**

- miRNA (highly/equally abundant sRNA sequence perfectly aligned to the precursor, identified in NGS data and confirmed by northern hybridization)
- alternative sRNA (identified in NGS data and - in case of novel miRNA - confirmed by northern hybridization)
- miRNA\* (significantly less abundant sRNA sequence perfectly matching to the precursor and identified in NGS data)
- indicates precursor with experimentally confirmed primary transcript gene

**(a) conservative miRNAs**

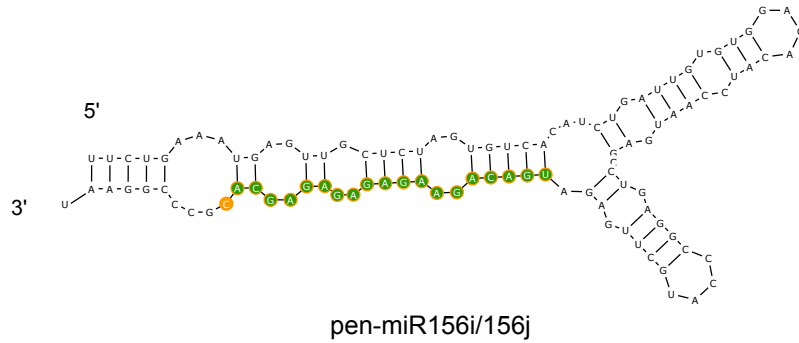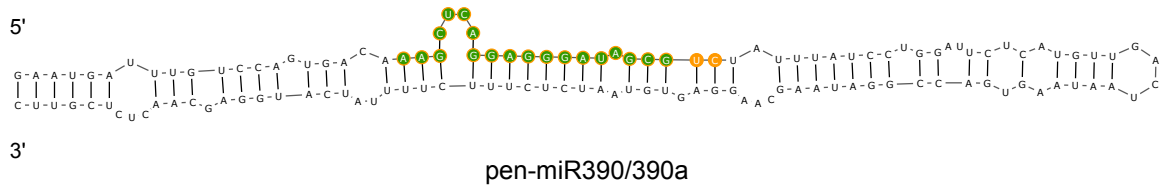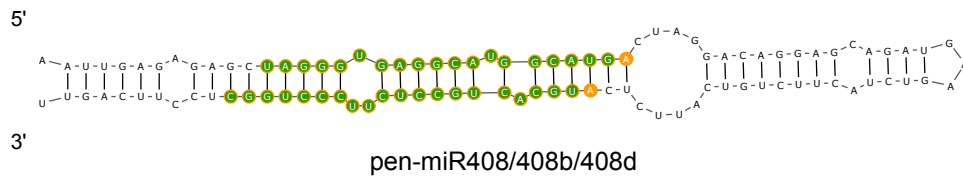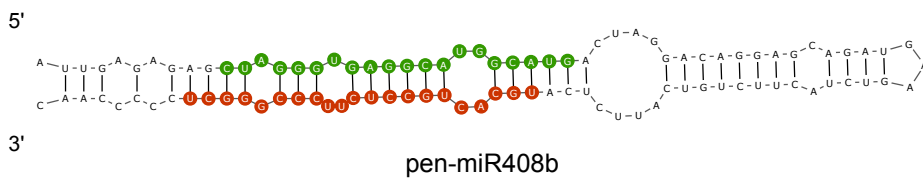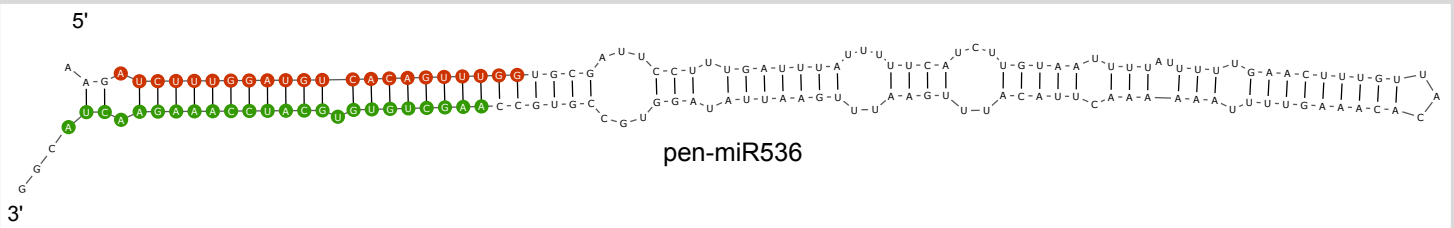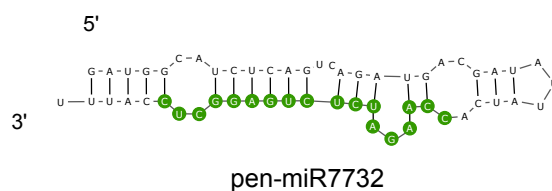



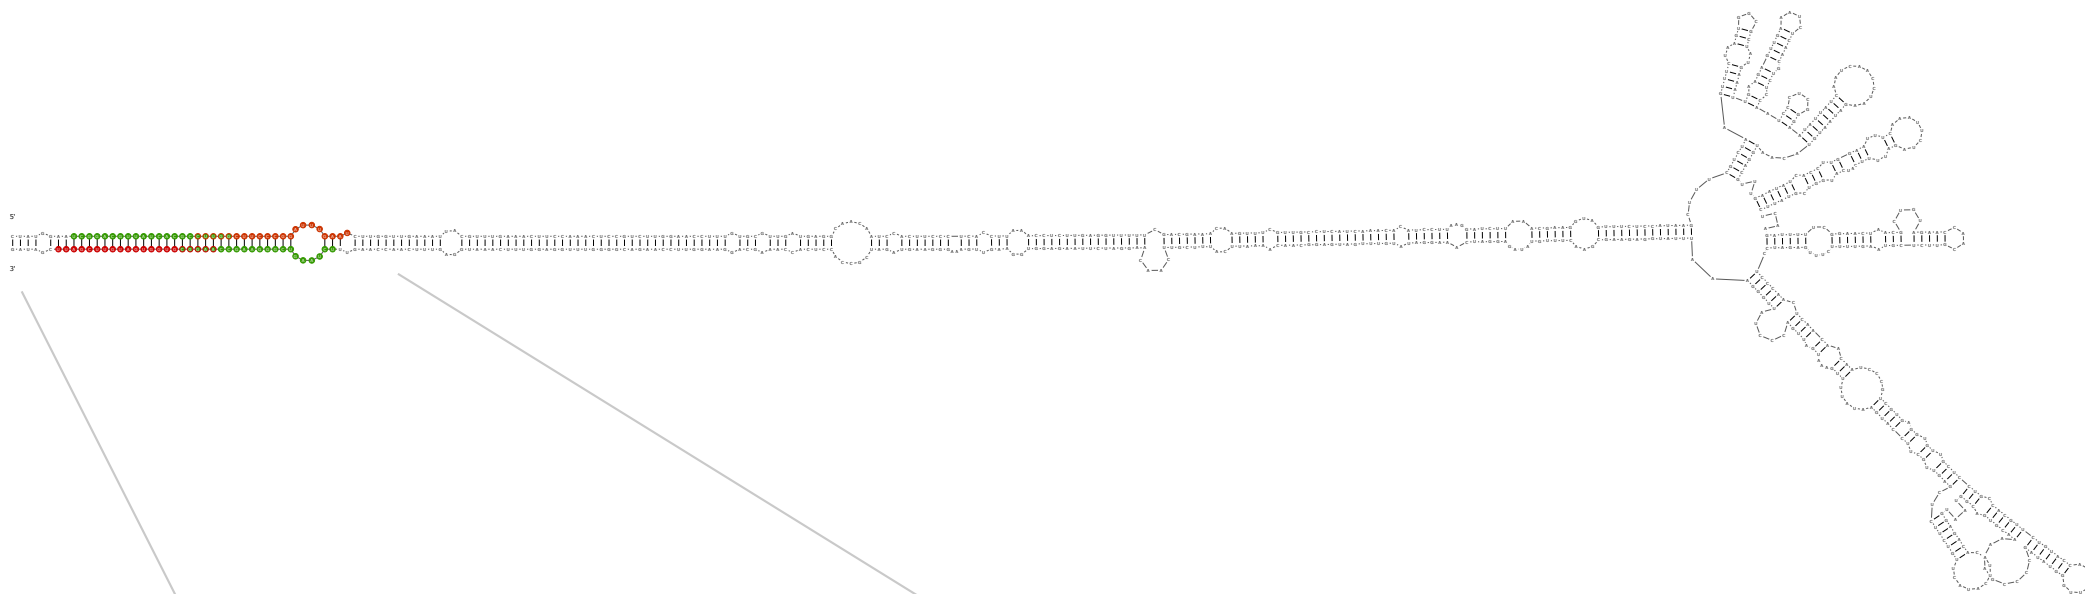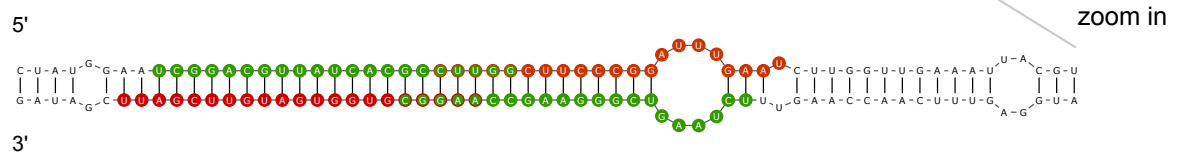

pen-miR8172



**Table S1 Oligonucleotides that were used in the experiments.**

| No.                                                                                                                                                    | Name           | Sequence (5'→3')                     |
|--------------------------------------------------------------------------------------------------------------------------------------------------------|----------------|--------------------------------------|
| <u>primers specific for the amplification of the <i>rps11 – rpl2</i> plastid gene cluster across Chlorophyta species (Provan <i>et al.</i>, 2004)</u>  |                |                                      |
| 1                                                                                                                                                      | UCP5           | acttchgggchaghgawataatt*             |
| 2                                                                                                                                                      |                | gaaachcgdatgggdtckgg*                |
| * after IUPAC nucleotide code: h (A or C or T), w (A or T)                                                                                             |                |                                      |
| <u>primers for the amplification of a portion of the small subunit rRNA specific for arbuscular endomycorrhizal- fungi (Simon <i>et al.</i>, 1992)</u> |                |                                      |
| 3                                                                                                                                                      | VANS1          | gtctagtataatcgttatacagg              |
| 4                                                                                                                                                      | NS2            | ggctgctggcaccagacttgc                |
| <u>universal primers for the amplification of a portion of the eukaryotic small subunit rRNA (Simon <i>et al.</i>, 1992)</u>                           |                |                                      |
| 5                                                                                                                                                      | NS1            | gtagtcatatgcttctc                    |
| 4                                                                                                                                                      | NS2            | ggctgctggcaccagacttgc                |
| <u>Oligonucleotides used for small RNA library preparation</u>                                                                                         |                |                                      |
| 6                                                                                                                                                      | 5' RNA adaptor | guucagaguucacaguccgacgauc            |
| 7                                                                                                                                                      | 3' RNA adaptor | 5Phos/ -ucgaugeccgucucugcuugu/3SpC3/ |
| <u>novel miRNA hybridization probes</u>                                                                                                                |                |                                      |
| 8                                                                                                                                                      | Control probe  | acgccctacaacccaaggag                 |
| 9                                                                                                                                                      | cre-miR1444b   | tgctgctccaccctac                     |
| 10                                                                                                                                                     | pen-miR8156a   | tcctagacgatgtgtgggaga                |
| 11                                                                                                                                                     | pen-miR8156b   | gcctagacgatgtgtgggaga                |
| 12                                                                                                                                                     | pen-miR8156d   | tcctagacgatgtgtgggaga                |
| 13                                                                                                                                                     | pen-miR8157    | tcctagacgatgtgtgggaga                |
| 14                                                                                                                                                     | pen-miR8158    | tcctagacgatgtgtgggaga                |
| 15                                                                                                                                                     | pen-miR8159a   | ttccagactctcaaggtaa                  |
| 16                                                                                                                                                     | pen-miR8159b   | ttccagactctcaaggtaa                  |
| 17                                                                                                                                                     | pen-miR8159b   | tattgcccagactcttaggga                |
| 18                                                                                                                                                     | pen-miR8161    | ggctccacctctctctcgaa                 |
| 19                                                                                                                                                     | pen-miR8162-3p | cgctgtgaagaaatggatcca                |
| 20                                                                                                                                                     | pen-miR8162-5p | tccggtccaattcttataaa                 |
| 21                                                                                                                                                     | pen-miR8163    | tgagattgtttcttccacgggg               |
| 22                                                                                                                                                     | pen-miR8164    | ggggaagttgccacaaattg                 |
| 23                                                                                                                                                     | pen-miR8165    | aaggaaagtcctctctagcaa                |
| 24                                                                                                                                                     | pen-miR8165    | gaactgatgtctccaaagcaa                |
| 25                                                                                                                                                     | pen-miR8167    | gattgggtatagtaggcattg                |
| 26                                                                                                                                                     | pen-miR8168    | ccgattgagctacgtcccc                  |

|                                             |                           |                               |
|---------------------------------------------|---------------------------|-------------------------------|
| 27                                          | pen-miR8169               | agctcaacccttcttatcgca         |
| 28                                          | pen-miR8170               | atgcatctcctctgtgaagca         |
| 29                                          | pen-miR8171               | ctcagtccecatgttctattg         |
| 30                                          | pen-miR8172.1             | ccaaggcgtgataacgtccga         |
| 31                                          | pen-miR8172.2             | gccttggttcccgaactaga          |
| 32                                          | pen-miR8173               | tacgatcacatctcctactgg         |
| 33                                          | pen-miR8175               | gattggatatagcaggcatgg         |
| 34                                          | pen-miR8176               | tttgaggctctgaaacacaga         |
| 35                                          | pen-miR8177               | catgccctgcagtcacatcaga        |
| 36                                          | pen-miR8178               | gttcctacataatccggtag          |
| 37                                          | pen-miR8178               | agttatgcctactgtatcca          |
| 38                                          | pen-miR8180               | gacgacgagtgcaagtctgta         |
| 39                                          | pen-miR8181               | ggccatccgaccgcacgggc          |
| 40                                          | pen-miR8182               | tgtaagtgccagactgagaga         |
| 41                                          | pen-miR8183.1             | gcctccttccagtccecggttc        |
| 42                                          | pen-miR8183.2             | tctcagcctccttccagtccc         |
| 43                                          | pen-miR8184               | gtcacaatgtctcttctcca          |
| 44                                          | pen-miR8185               | caacaaaacctatctcttta          |
| 45                                          | pen-miR8186               | ctgggatctgcttctgcaag          |
| 46                                          | pen-miR8187               | cattccatactccataccttgt        |
| 47                                          | pen-miR8188               | tggttccggtgcagcgtttct         |
| 48                                          | pen-miR8189               | acaacctgtactatctctct          |
|                                             |                           |                               |
| <u>conserved miRNA hybridization probes</u> |                           |                               |
| 49                                          | aly-miR157a               | gtgctctctatcttctgcaa          |
| 50                                          | ppt-miR160a               | tggcatacagggagccaggca         |
| 51                                          | ppt-miR166a               | ggggaatgaagcctggccga          |
| 52                                          | sbi-miR168                | gtcccgatctgcaccaagcga         |
| 53                                          | ppt-miR319d               | gggagctccctcagtcgaag          |
| 54                                          | ppt-miR390a               | ggcgctatccctctgagctt          |
| 55                                          | ppt-miR408b               | agccaggggaagaggcagtgca        |
| 56                                          | ppt-miR477a-5p            | tggaagcctttgaggagag           |
| 57                                          | ppt-miR894                | ggtgaaccgcagtgaaacg           |
|                                             |                           |                               |
| <u>RACE and Genome walking experiments</u>  |                           |                               |
| 58                                          | miR8165_3p_clearup_F      | tggtttgcatggttaaaaagtg        |
| 59                                          | miR8165_3p_clearup_GW2    | ccactcatggatttgacattgtatcacc  |
| 60                                          | miR8165_3p_clearup_R      | cgagattcaagagtattaatattaatgca |
| 61                                          | miR8165_5p_clearup_brut_F | atgggggatcattctttgtg          |
| 62                                          | miR8165_5p_clearup_brut_R | cgctaggccactgaaggtc           |
| 63                                          | miR8165_5p_clearup_GW     | ggaatcgactgaatcaaaccgaagt     |
| 64                                          | miR8165_gen_For           | acgcttcactgatcgtttttgtga      |
| 65                                          | miR8165_gen_Rev           | gtcatacaciaaacacgatcaagtgaagc |

|     |                          |                                |
|-----|--------------------------|--------------------------------|
| 66  | 408_5p_clearup_F         | atgggaggggaacagacactg          |
| 67  | 408_5p_clearup_R         | gaggcagtgcatgagaatga           |
| 68  | 408_gen_5p_For           | gtaagaattggaaccggatctgctagg    |
| 69  | 408_gen_5p_Rev           | cctagcagatccggttccaattcttac    |
| 70  | 408bGSP1(b)              | catgatcagctcacctcaagggaat      |
| 71  | 408bGSP2(b)              | gaggcaatgcatgccagcgtgag        |
| 72  | 408bNGSP1(b)             | ggatcctccagtccagacatccttgc     |
| 73  | 408bNGSP2(b)             | cgcgtctaaggctgattaagggtggtt    |
| 74  | miR8187_3p_clearup_F     | ggaggtggatgattgacgta           |
| 75  | miR8187_3p_clearup_R     | tgtatattagaagccaaatgtgtca      |
| 76  | 536_3p_clearup_F         | attgtagtggctgacgataggagaag     |
| 77  | 536_3p_clearup_R         | taaagaatgaaacctgggatgtaa       |
| 78  | 536_5p_clearup_GW1       | ttcaactctgaatcacctttctcgagtc   |
| 79  | 536_5p_clearup_GW2       | tcccatcaataatcactagtgtggttca   |
| 80  | Gen_miR8187_5p1_Marta    | ccgtgttctgtattcatgataccacatgc  |
| 81  | Gen_miR8187_5p2_Marta    | catagccttgactgcatcgagataactt   |
| 82  | Gen_miR8178_3p_Basia     | atacgttacgtgaacttactgttcc      |
| 83  | Gen_miR8178_5p_Basia     | gacgtcatgaagatgttctgtattg      |
| 84  | Gen_miR408_3p1_Kara      | cctgcatgaaaagcacagtacagaaggat  |
| 85  | Gen_miR408_3p2_Kara      | gcatgactaggacaggagcagatgaagtc  |
| 86  | Gen_miR408_5p1_Kara      | tcttcccacgtatatccttctgtactgtgc |
| 87  | Gen_miR408_5p2_Kara      | gcagcttggatatccaggctcatgtgc    |
| 88  | GW_408_NGSF              | gggcaaaccataagggtgaacttatcat   |
| 89  | GW_408_GSF               | atgttgggtacggagttgctaaggagta   |
| 90  | GW_408_GSR               | aagaggcagtgcacaccaatgaataat    |
| 91  | GW_408_NGSR              | tttccggaacaatatgaaggacgtat     |
| 92  | MIR8183.1_5p_clearup_GW1 | gcgagaggtaattgaagaggtaattggaa  |
| 93  | MIR8183.1_5p_clearup_GW1 | gcgagaggtaattgaagaggtaattggaa  |
| 94  | MIR8183.1_5p_clearup_GW2 | atacacgtaggaatggaaagcgagtatcc  |
| 95  | MIR8183.1_5p_clearup_GW2 | atacacgtaggaatggaaagcgagtatcc  |
| 96  | MIR8183.1_gen_3p_For     | cgtggatcgtggtatgcattgtgt       |
| 97  | MIR8183.1_gen_3p_Rev     | ggaggccgagaacttcgataataacag    |
| 98  | MIR8183.1_gen_5p_For     | tcattttcttgatgaacaaaggcctc     |
| 99  | MIR8183.1_gen_5p_Rev     | caccaacaataacctcaatcaacaatgac  |
| 100 | MIR8186_gen_3p_For       | gcggtaggggatgtctggtatctactt    |
| 101 | MIR8186_gen_3p_Rev       | caagtagataccagacatcccctaccg    |
| 102 | MIR8186_gen_5p_For       | acgcttcacttgatcgtgtttgtgta     |
| 103 | MIR8186_gen_5p_Rev       | gtcatacacaacacgatcaagtgaage    |
| 104 | MIR8190_3p_NS_GW1        | atcggtgtattgctgattatttccatt    |
| 105 | MIR8190_3p_NS_GW1        | atcggtgtattgctgattatttccatt    |
| 106 | MIR8190_3p_NS_GW2        | aacctgtaatgaaggcccgagtaagta    |
| 107 | MIR8190_3p_NS_GW2        | aacctgtaatgaaggcccgagtaagta    |
| 108 | MIR8185_3p_GW1_new       | catttgacattgccttccagtggat      |



|     |                    |                                 |
|-----|--------------------|---------------------------------|
| 109 | MIR8185_3p_GW2_new | tttgaaccctctgagctgttctctcac     |
| 110 | MIR8185_5p_GW1_new | ataccactggaaaggcaatgtcaaatg     |
| 111 | MIR8185_5p_GW2_new | agtaggaagcatagtcctcaccaca       |
| 112 | SL_miR8165_39420_1 | gtggagttctgcacggaaagacgatag     |
| 113 | SL_miR8165_39420_2 | tctacatcacgcggacttgattctgg      |
| 114 | SL_miR8165_7756_1  | actgaggtgggagttcttgaaggcta      |
| 115 | SL_miR8165_7756_2  | gtctgtgcttctgtgctggcatgtagt     |
| 116 | TR_408_10_4_3p_b   | tgcaagaatgtaccatgtgaagaacaggtg  |
| 117 | TR_408_5p_b        | gacttcatctgctcctgtcctagtcatgc   |
| 118 | TR_408_8_1_3p_b1   | gctccccaacatatatggaaccagt       |
| 119 | TR_408_8_1_3p_b2   | ccaacgaagttttatttgggtgatgtg     |
| 120 | TR_408_8_2_3p_b    | ctcttcctggctccttcagtttctca      |
| 121 | TR_408a            | catgactaggacaggagcagatgaagtct   |
| 122 | TR_408b            | cctggctccttcagtttctcattcatatag  |
| 123 | TR_408c            | aatgagaaactgaaggagccagggaag     |
| 124 | TR_408d            | gcagtgcatagagaatgacagaagtagac   |
| 125 | TR_536_5p_b        | aaggaatcgaccaaactgtgacatcc      |
| 126 | TR_536a            | cacagtttgggtgcgattcctttgattt    |
| 127 | TR_536b            | ggtgcgattcctttgatttattttctac    |
| 128 | TR_536c            | ggcacggcacctataattcatattcaaa    |
| 129 | TR_536d            | aataaatcaaaggaatcgaccaaactgt    |
| 130 | TR_MIR8165_5p_b1   | aatcgaacttgctactacgcgaagaaaa    |
| 131 | TR_MIR8165_5p_b2   | catgtactctgcgttgataccactgctg    |
| 132 | TR_MIR8165a        | gttgattgagggtattgttggtgagatg    |
| 133 | TR_MIR8165b        | ccctttgttcatcaagaaaaatgaacttg   |
| 134 | TR_MIR8165c        | tcattttcttgatgaacaaagggcatc     |
| 135 | TR_MIR8165d        | caccaacaataccctcaatcaacaatgac   |
| 136 | TR_MIR8187a        | cgtggatcgtggtatgcattgttgt       |
| 137 | TR_MIR8187b        | acattctgcggtcaaggctcgtttc       |
| 138 | TR_MIR8187c        | taacatgatatgggcggaatagggaaaac   |
| 139 | TR_MIR8187d        | gaatgtgacaacaatgataccacgat      |
| 140 | TR_MIR8178_3p_b1   | agaggaccaatgtaggcaattttccaaac   |
| 141 | TR_MIR8178_3p_b2   | gaccaatgtaggcaattttccaaacgatag  |
| 142 | TR_MIR8178a        | gggaaccaggacatggtttacattatct    |
| 143 | TR_MIR8178b        | cgttgatgacttataggacccaagataa    |
| 144 | TR_MIR8178c        | tcatgtttatgatcattgatggtgatgg    |
| 145 | TR_MIR8178d        | cgttgatgacttataggacccaaga       |
| 146 | TR_MIR408_3p_b     | gcatgactaggacaggagcagatgaagtc   |
| 147 | TR_MIR408_5p_b     | acgcgtgccctatagtgagtcgtattaca   |
| 148 | TR_MIR408a         | tgaagtctactctgtcatttctcatgcac   |
| 149 | TR_MIR408b         | agaagtagacttcatctgctcctgtcctagt |
| 150 | TR_MIR408c         | ggcatggcatgactaggacagg          |
| 151 | TR_MIR408d         | gaagaggcagtgcatgagaatgaca       |

|                            |                      |                                |
|----------------------------|----------------------|--------------------------------|
| 152                        | TR_NL1               | tgagagcaaaggcctgttattatcgaa    |
| 153                        | TR_NL1_5p_b          | attagccaactcgagagccaggactcaa   |
| 154                        | TR_NL10              | aagcaagtgcaaattccaaaaccac      |
| 155                        | TR_NL11              | gtaagaattggaaccggatctgctagg    |
| 156                        | TR_NL12              | cctagcagatccggttccaattcttac    |
| 157                        | TR_NL13              | gttctgttcccaatctcttcatcttg     |
| 158                        | TR_NL14              | caagatgaagagattgggcaacagaac    |
| 159                        | TR_NL2               | ggaggccgagaactcgataataacag     |
| 160                        | TR_NL3               | acgcttcactgatcgtgttttgta       |
| 161                        | TR_NL3_5p_b          | gtagataccagacatcccctaccgccagt  |
| 162                        | TR_NL4               | gtcatacacaacacgatcaagtgaagc    |
| 163                        | TR_NL4_3p_b          | tgcttggtcaaaccttaactactcg      |
| 164                        | TR_NL5               | gcggtaggggatgtctggtatctactt    |
| 165                        | TR_NL6               | caagtagataccagacatcccctaccg    |
| 166                        | TR_NL6_3p_b1         | cgggatattgagaagttgaggatacga    |
| 167                        | TR_NL6_3p_b2         | ttatcattatgccaggacgtgttagcc    |
| 168                        | TR_MIR8185           | cgagtgtagttgcttgggtcaaac       |
| 169                        | TR_NL8               | agggtttgaaccaaggcaactacac      |
| 170                        | TR_NL9               | ctctctcactgaagccactgagaa       |
| 171                        | TR_408a              | catgactaggacaggagcagatgaagtct  |
| 172                        | TR_408b              | cctggctccttcagtttctcattcatatag |
| 173                        | TR_408c              | aatgagaaactgaaggagccaggggaag   |
| 174                        | TR_408d              | gcagtgcatagagaatgacagaagtagac  |
| 175                        | miR8165_3p_clearup_R | cgagattcaagagtattaatattaatgca  |
| 176                        | MIR8185_5`_RACE_fin1 | gcatctgtgatggaaggtattttactgct  |
| 177                        | MIR8185_5`_RACE_fin2 | cactcctaaatcgaggctcatcaatgtg   |
|                            |                      |                                |
| <b>Genomic PCR primers</b> |                      |                                |
| 178                        | 536_gen_3p_For       | gttgattgagggtattgttggtgagatg   |
| 179                        | 536_gen_3p_Rev       | ccctttgttcatcaagaaaaatgaacttg  |
| 180                        | 536_gen_5p_For       | gttctgttcccaatctcttcatcttg     |
| 181                        | 536_gen_5p_Rev       | caagatgaagagattgggcaacagaac    |
| 182                        | miR8178_gen_5p_For   | ctctctcactgaagccactgagaa       |
| 183                        | miR8178_gen_5p_Rev   | aagcaagtgcaaattccaaaaccac      |
| 184                        | miR8187_gen_3p_For   | cgagtgtagttgcttgggtcaaac       |
| 185                        | miR8187_gen_3p_Rev   | agggtttgaaccaaggcaactacac      |
| 186                        | miR8187_gen_5p_For   | gcggtaggggatgtctggtatctactt    |
| 187                        | miR8187_gen_5p_Rev   | caagtagataccagacatcccctaccg    |
| 188                        | FIN_408_5p_F         | atgggaggggaacagacactgaat       |
| 189                        | FIN_408_5p_R         | acttcatctgctctgtcctagtca       |
| 190                        | FIN_miR8187_3p_F     | gtggatgcattgttgacattct         |
| 191                        | FIN_miR8187_3p_R     | tccaacttggtccaacaaaag          |
| 192                        | FIN_miR8187_5p_F     | atgggatccacttaccgttct          |

|     |                        |                               |
|-----|------------------------|-------------------------------|
| 193 | FIN_miR8187_5p_R       | actttgcctctcatagagatgtcgt     |
| 194 | FIN_536_3p_F           | tttcagtaagaagatctttggatgtca   |
| 195 | FIN_536_3p_R           | taaagaatgaaacctgggatgtaa      |
| 196 | FIN_536_5p_F           | gacagtgcgtccatacagagtg        |
| 197 | FIN_536_5p_R           | tgacatccaaagatcttcttactgaaa   |
| 198 | FIN_miR8178_5p_F       | ggaagttatgatcgtggagtgtct      |
| 199 | FIN_miR8178_5p_R       | gggaaattaccacaccgtaacaaa      |
| 200 | FIN_miR408_3p_F        | cattccaatattcagaaaggacctg     |
| 201 | FIN_miR408_3p_R        | catggaatcaaatgctcaatattact    |
| 202 | FIN_miR408_5p_F        | gtgtgttgaccaatgaaagctga       |
| 203 | FIN_miR408_5p_R        | caattcattcatttcttcccacgta     |
| 204 | FIN_MIR8183.1_3p_F     | aggcctgttattatcgaagttctcg     |
| 205 | FIN_MIR8183.1_3p_R     | cgaccaaggcaaattatattaacaca    |
| 206 | FIN_MIR8186_3p_F       | caagttattcatggttttgtgtg       |
| 207 | FIN_MIR8186_3p_R       | ctgatgaaatccttgagtaattaatc    |
| 208 | MIR8183.1_3p_clearup_F | gagcaaaggcctgttattatcgaagtct  |
| 209 | MIR8183.1_3p_clearup_R | cgaccaaggcaaattatattaacacaggt |
| 210 | ath156a_F_csp          | gagaaacgcaaagaaactgaca        |
| 211 | ath156a_R_csp          | gatcagcaccggaatctgac          |
| 212 | ath156a_R_sp           | tctgacagaaagagcagtgagc        |
| 213 | ppt156a_F_csp          | gtggaggatgtgggagtgac          |
| 214 | ppt156a_R_csp          | agaggtgacaggaagaga            |
| 215 | ppt156a_R_sp           | tgcgacaggaagagagtgagc         |
| 216 | ath160a_F_csp          | atgctgagccatcagat             |
| 217 | ath160a_R_csp          | tatgcatggctcctacacg           |
| 218 | ath160a_R_sp           | tatgcatggctcctacacgc          |
| 219 | ppt160a_F_csp          | aactgcctggctccctgt            |
| 220 | ppt160a_R_csp          | gctatgcagctcgacaatca          |
| 221 | ppt160a_R_sp           | tctgtctggctccctggatgc         |
| 222 | ath166a_F_csp          | aggggctttctctttgagg           |
| 223 | ath166_R_csp           | aatgaagcctggctccgaag          |
| 224 | ath166_F_sp            | ggactgttgtctggctcagag         |
| 225 | 166_R_sp               | ggggaatgaagcctggctccga        |
| 226 | ppt166a_F_csp          | gaagccatgtgcctttcat           |
| 227 | ppt166a_R_csp          | gcctggctccgaagctttaat         |
| 228 | ppt166a_F_sp           | ggaatgccccctggcccgaagc        |
| 229 | sbi168_F_csp           | ctcgttggtgcagatcg             |
| 230 | sbi168_R_csp           | ggattcacttggtgcaagg           |
| 231 | sbi168_R_sp            | attcacttggtgcaaggcggg         |
| 232 | ath168a_F_csp          | ttggtttgtgagcagggatt          |
| 233 | ath168a_R_csp          | ggatccgattcagttgatgc          |
| 234 | ath168a_F_sp           | tcgcttggtgcaggtcgggaa         |
| 235 | ath168a_R_sp           | attcagttgatgcaaggcggg         |

|     |                      |                               |
|-----|----------------------|-------------------------------|
| 236 | Ppt319c_F_csp        | ggagcttccttcggttcaat          |
| 237 | Ppt319c_R_csp        | gagctcccttcagccaaga           |
| 238 | Ppt319c_F_sp         | gagcttccttcggttcaatag         |
| 239 | Ppt319c_R_sp         | gggagctcccttcagccaag          |
| 240 | Ath319a_F_csp        | tgagtccattcacaggcgt           |
| 241 | Ath319a_R_csp        | gtcccttcagccaatcaa            |
| 242 | Ath319a_F_sp         | agagcttccttcagtcattc          |
| 243 | Ath319a_R_sp         | agggagctcccttcagcca           |
| 244 | Ath408_F_csp         | ggaacaagcagagcatgat           |
| 245 | Ath408_R_csp         | agcaataaaattccattgaaagc       |
| 246 | Ath408_F_sp          | caggaacaagcagagcatgg          |
| 247 | 408_R_sp             | gccaggaagaggcagtgcat          |
| 248 | ppt156_F_csp         | gtgaggcaatgcatgacaac          |
| 249 | ppt156_R_csp         | cagtgcagaggacaacacc           |
| 250 | ppt156_F_sp          | ccagcgtgaggcaatgcatg          |
| 251 | MIR156a_For          | tgacagaagagagtgcac            |
| 252 | Ath_MIR156a_Rev      | tctgacagaaagagcagtgagc        |
| 253 | ppt_MIR156a_Rev      | tgcgacaggaagagagtgcac         |
| 254 | ath_MIR408_For       | caggaacaagcagagcatgg          |
| 255 | ppt_MIR408b_For      | ccagcgtgaggcaatgcatg          |
| 256 | MIR408b_Rev          | agccaggaagaggcagtgca          |
| 257 | miR8187_gen_3p_For   | tgtacaactttaagatgacctgata     |
| 258 | miR8187_gen_3p_Rev   | gtatattagaagccaaatgtgtcact    |
| 259 | miR8178_gen_5p_For   | tttgaccgatgttttcgcatgatga     |
| 260 | miR8178_gen_5p_Rev   | tcgttgatgacttataggaccecaagat  |
| 261 | 408_gen_5p_For       | ctaatacgactcactatagggaagca    |
| 262 | 408_gen_5p_Rev       | gttggaatatctcaaaggaaactggt    |
| 263 | 536_gen_5p_For       | ctaatacgactcactatagggaagca    |
| 264 | 536_gen_5p_Rev       | gttggaatatctcaaaggaaactggt    |
| 265 | 536_gen_3p_For       | ctaatacgactcactatagggaagca    |
| 266 | 536_gen_3p_Rev       | gttggaatatctcaaaggaaactggt    |
| 267 | MIR8183.1_gen_5p_For | taaaaagtattcagttcaagctcgaga   |
| 268 | MIR8183.1_gen_5p_Rev | ggtaattgaagaggttaattggaaggtta |
| 269 | MIR8183.1_gen_3p_For | caaaggcctgtattatcgaagtctc     |
| 270 | MIR8183.1_gen_3p_Rev | aggcaaattatattaacacaggatcatca |
| 271 | MIR8186_gen_5p_For   | ggatatttggtgacgtacaataatga    |
| 272 | MIR8186_gen_5p_Rev   | aagttttcaacagcggagaaggttat    |
| 273 | MIR8186_gen_3p_For   | gaaggatgcttgatatactctgactgat  |
| 274 | MIR8186_gen_3p_Rev   | actcaagctatgcatccaacg         |
| 275 | NS1                  | gtagtcatatgctgtctc            |
| 276 | VANS1                | gtctagtataatcgttatacagg       |
| 277 | NS2                  | ggctgctggcaccagacttgc         |
| 278 | miR8187_CaGe_For     | atccacttaccgttccttgg          |

|     |                  |                             |
|-----|------------------|-----------------------------|
| 279 | miR8178_CaGe_Rev | aataggggtggaacaaatcttctgg   |
| 280 | miR408_CaGe_For  | ggcccttctctccgagtac         |
| 281 | 408_CaGe_For     | agggaacagacactgaattgga      |
| 282 | 408_CaGe_Rev     | tggaatcaagatgetcaatatattact |
| 283 | UCP3_For         | cgwattttvccd gagatggc       |
| 284 | UCP3_Rev         | atgtatgcktttttagatcgt       |
| 285 | UCP5_For         | acttchggtgchaghgawataatt    |
| 286 | UCP5_Rev         | gaaachcgdatgggdtckgg        |
| 287 | PSforward        | gggattagataccccwgtagtcct    |
| 288 | PSreverse        | ccctaactatggggwcatcagga     |
| 289 | Uf               | gagagttgatcctggtcag         |
| 230 | Ur               | acggytacctgttacgactt        |
| 231 | PSkp1_For        | gctatactacatcatccagtt       |
| 232 | PSkp1_Rev        | aaacacaataactaccgcacg       |

**Table S3 25 pri-miRNAs that were identified in the *P. endiviifolia* transcriptome.** a – Precursors that were predicted for conservative miRNA in *P. endiviifolia*, b - Precursors that were predicted for novel miRNA in *P. endiviifolia*. cDNA IDs in bold represent the pre-miRNAs with secondary structures that are presented in Fig. S6. Other pre-miRNAs from the table that have the same pre-miRNA sequence and structure as their counterparts are marked in bold; however, they originate from different pri-miRNAs. In the case of two cDNA IDs for microRNA408b, two different pri-miRNAs having the same pre-miRNA sequence have been identified.

(a)

| pre-miRNA   | cDNA ID                                  | pre-miRNA length (bp) | MFE   | miR-5p                   |        |                   | miR-3p            |          |                   |
|-------------|------------------------------------------|-----------------------|-------|--------------------------|--------|-------------------|-------------------|----------|-------------------|
|             |                                          |                       |       | name                     | coords | mean counts (TPM) | name              | coords   | mean counts (TPM) |
| pen-miR156i | <b>pen_U1176</b>                         | 104                   | -23.9 | -                        | 11..28 | -                 | pen-miR156i       | 76..94   | 1.924             |
| pen-miR156j |                                          |                       |       | -                        | 12..28 | -                 | pen-miR156j       | 76..95   | 4.428             |
| pen-miR390  | <b>pen_U28358</b>                        | 131                   | -30.8 | pen-miR390               | 21..41 | 2199.484          | -                 | 93..110  | -                 |
| pen-miR390a |                                          | 131                   | -30.8 | pen-miR390a              | 21..39 | 235.632           | -                 | 96..110  | -                 |
| pen-miR408  | <b>pen_C1398-2</b>                       | 102                   | -57.1 | pen-miR408               | 13..32 | 8285.828          | pen-miR408        | 72..92   | 388.612           |
| pen-miR408b |                                          | 102                   | -57.1 | pen-miR408b <sup>○</sup> | 13..32 | 94669.436         | pen-miR408b       | 73..93   | 42350.7           |
| pen-miR408d |                                          | 102                   | -57.1 | pen-miR408d              | 13..31 | 472.366           | pen-miR408d       | 73..92   | 512.646           |
| pen-miR408  |                                          | 102                   | -57.1 | pen-miR408               | 13..32 | 8285.828          | pen-miR408        | 72..92   | 388.612           |
| pen-miR408b | pen_C1398-4                              | 102                   | -57.1 | pen-miR408b <sup>○</sup> | 13..32 | 94669.436         | pen-miR408b       | 73..93   | 42350.7           |
| pen-miR408d |                                          | 102                   | -57.1 | pen-miR408d              | 13..31 | 472.366           | pen-miR408d       | 73..92   | 512.646           |
| pen-miR408b | <b>pen_C1398-1</b><br><b>pen-MIR408b</b> | 100                   | -49.9 | pen-miR408b <sup>○</sup> | 4..11  | 94669.436         | pen-miR408b       | 72..92   | 697.546           |
| pen-miR408b | pen_C1398-3<br>pen-MIR408b               | 100                   | -49.9 | pen-miR408b <sup>○</sup> | 4..11  | 94669.436         | pen-miR408b       | 72..92   | 697.546           |
| pen-miR536  | <b>pen-MIR536</b>                        | 157                   | -60.6 | pen-miR536               | 4..25  | 7.742             | phased pen-miR536 | 131..154 | 53.19             |
| pen-miR7732 | <b>pen_U39007</b>                        | 55                    | -12.1 | -                        | 7..23  | -                 | pen-miR7732       | 33..50   | 76.638            |

○ hybridized sRNA

**(b)**

| pre-miRNA   | cDNA ID            | pre-miRNA length (bp) | MFE    | miR-5p                      |        |                   | miR-3p                      |          |                   |
|-------------|--------------------|-----------------------|--------|-----------------------------|--------|-------------------|-----------------------------|----------|-------------------|
|             |                    |                       |        | name                        | coords | mean counts (TPM) | name                        | coords   | mean counts (TPM) |
| pen-miR8159 | <b>pen_U3835</b>   | 65                    | -9.4   | pen-miR8159a <sup>○</sup>   | 8..28  | 298119.06         | -                           | 37..56   | -                 |
|             |                    |                       |        | pen-miR8159b <sup>○</sup>   | 8..27  | 116532.2          | -                           | 38..57   | -                 |
| pen-miR8162 | <b>pen-MIR8162</b> | 89                    | -45.9  | pen-miR8162-5p <sup>○</sup> | 9..29  | 75985.524         | pen-miR8162-3p <sup>○</sup> | 64..84   | 65120.304         |
| pen-miR8165 | <b>pen-MIR8165</b> | 129                   | -52.8  | pen-miR8165 <sup>○</sup>    | 10..30 | 59900.202         | pen-miR8165                 | 102..122 | 143.178           |
| pen-miR8166 | <b>pen_U10062</b>  | 211                   | -67.1  | pen-miR8166                 | 18..39 | 18.06             | pen-miR8166 <sup>○</sup>    | 176..197 | 245117.488        |
| pen-miR8172 | <b>pen_C578-1</b>  | 834                   | -365.0 | pen-miR8172.1 <sup>○</sup>  | 9..29  | 57485.066         | pen-miR8172.1               | 808..828 | 1291.39           |
|             |                    |                       |        | pen-miR8172.2               | 25..45 | 3.53              | pen-miR8172.2 <sup>○</sup>  | 792..812 | 14799.006         |
|             | <b>pen_C578-2</b>  | 834                   | -365.0 | pen-miR8172.1 <sup>○</sup>  | 9..29  | 57485.066         | pen-miR8172.1               | 808..828 | 1291.39           |
|             |                    |                       |        | pen-miR8172.2               | 25..45 | 3.53              | pen-miR8172.2 <sup>○</sup>  | 792..812 | 14799.006         |
| pen-miR8178 | <b>pen-MIR8178</b> | 86                    | -39.1  | pen-miR8178 <sup>○</sup>    | 15..35 | 1409.482          | pen-miR8178                 | 54..74   | 26231.568         |
| pen-miR8182 | <b>pen_C2867-1</b> | 116                   | -41.1  | pen-miR8182                 | 13..33 | 1724.464          | pen-miR8182 <sup>○</sup>    | 85..105  | 89872.874         |
|             | pen_C2867-2        | 116                   | -41.1  | pen-miR8182                 | 13..33 | 1724.464          | pen-miR8182 <sup>○</sup>    | 85..105  | 89872.874         |
|             | pen_C2867-3        | 116                   | -41.1  | pen-miR8182                 | 13..33 | 1724.464          | pen-miR8182 <sup>○</sup>    | 85..105  | 89872.874         |
|             | pen_C2867-4        | 116                   | -41.1  | pen-miR8182                 | 13..33 | 1724.464          | pen-miR8182 <sup>○</sup>    | 85..105  | 89872.874         |
| pen-miR8183 | <b>pen-MIR8183</b> | 94                    | -52.8  | pen-miR8183.2 <sup>○</sup>  | 15..35 | 111970.026        | pen-miR8183.2               | 62..82   | 1173.286          |
|             | pen_C2351-2        | 94                    | -52.8  | pen-miR8183.2 <sup>○</sup>  | 15..35 | 111970.026        | pen-miR8183.2               | 62..82   | 1173.286          |
| pen-miR8185 | <b>pen-MIR8185</b> | 88                    | -26.1  | pen-miR8185                 | 4..24  | 582.302           | pen-miR8185 <sup>○</sup>    | 67..87   | 21593.696         |
| pen-miR8186 | <b>pen-MIR8186</b> | 94                    | -45.4  | pen-miR8186 <sup>○</sup>    | 15..35 | 29270.628         | pen-miR8186                 | 61..81   | 271.562           |
| pen-miR8187 | <b>pen-MIR8187</b> | 96                    | -47.6  | pen-miR8187                 | 18..43 | 41.704            | pen-miR8187 <sup>○</sup>    | 59..82   | 7878.44           |
| pen-miR8190 | <b>pen-MIR8190</b> | 80                    | -40.4  | pen-miR8190 <sup>○</sup>    | 8..29  | 9799.494          | pen-miR8190                 | 54..75   | 143.24            |

○ hybridized sRNA

**Table S4 High expression of pen-miR8162-5p:pen-miR8162-3p in all of the sRNA NGS datasets.** The read counts in each sample were normalized to the total identified miRNAs counts in the sample and are presented in TP1M (tag per 1 million) form.

| miRNA name     | sequence             | length | Female from <i>in vitro</i> | Male from the environment | Male from <i>in vitro</i> | Female from the environment | Female from <i>in vitro</i> | mean counts |
|----------------|----------------------|--------|-----------------------------|---------------------------|---------------------------|-----------------------------|-----------------------------|-------------|
| pen-miR8162-5p | ttgtaagaattggaaccgga | 21     | 76876.23                    | 51560.86                  | 144441.15                 | 61826.68                    | 45222.7                     | 75985.524   |
| pen-miR8162-3p | tggatccattcttacagacg | 21     | 11226.93                    | 59086.13                  | 135350.99                 | 65668.31                    | 54269.16                    | 65120.304   |



**Table S5**

Target mRNAs of the known miRNAs that were identified in *P. endiviifolia* and confirmed by the degradome data. The gray color indicates conserved targets across land plants. Below the table, T-plots for identified targets are presented.

| miRNA family  | miRNA name                                 | Target                                                                                                             | PFAM domain / family                                                                                      | Molecular function                                                           | Cleavage site | Cleavage region |
|---------------|--------------------------------------------|--------------------------------------------------------------------------------------------------------------------|-----------------------------------------------------------------------------------------------------------|------------------------------------------------------------------------------|---------------|-----------------|
|               | pen-miR156a                                | pen_U37761                                                                                                         | Protein of unknown function (DUF1218)                                                                     | -                                                                            | 913           | CDS             |
| miR156        | pen-miR156ad                               | pen_C10956-2                                                                                                       | Membrane transport protein                                                                                | -                                                                            | 287           | 5'UTR           |
|               |                                            | pen_C10956-3                                                                                                       |                                                                                                           | -                                                                            | 287           | CDS             |
| miR159        | pen-miR159b                                | pen_U38944                                                                                                         | -                                                                                                         | -                                                                            | 803           | CDS             |
| miR160        | pen-miR160a,b,c,d,e,f,g                    | pen_U38297                                                                                                         | B3 DNA binding domain<br>Auxin response factor                                                            | DNA binding                                                                  | 2129          | CDS             |
|               | pen-miR160c                                | pen_C7409-1                                                                                                        | Dirigent-like protein                                                                                     | -                                                                            | 200           | CDS             |
| miR165/166    | pen-miR165a<br>pen-miR166a,b,c,d,e,g,i,j,m | pen_U34898                                                                                                         | Homeobox domain<br>START domain<br>MEKHLA domain                                                          | sequence-specific DNA binding transcription factor activity<br>lipid binding | 706           | CDS             |
| miR169        | pen-miR169t                                | pen_U8300                                                                                                          | Redoxin                                                                                                   | oxidoreductase activity                                                      | 760           | CDS             |
| miR319        | pen-miR319,c                               | pen_C9156-1                                                                                                        | RWP-RK domain                                                                                             | -                                                                            | 2138          | 3'UTR           |
|               | pen-miR319d.1                              | pen_U37540                                                                                                         | Zinc-finger (CX5CX6HX5H) motif                                                                            | -                                                                            | 1482          | 3'UTR           |
| miR390        | pen-miR390a                                | pen_U32458                                                                                                         | -                                                                                                         | -                                                                            | 118           | CDS             |
| miR391        | pen-miR391                                 | pen_U34504                                                                                                         | S4 domain                                                                                                 | RNA binding                                                                  | 864           | CDS             |
| miR396        | pen-miR396b                                | pen_C3067-1                                                                                                        | -                                                                                                         | -                                                                            | 939           | CDS             |
|               | pen-miR396d                                | pen_U7769                                                                                                          | Leucine rich repeat N-terminal domain                                                                     | protein binding                                                              | 3345          | CDS             |
|               | pen-miR397b                                | pen_U7431                                                                                                          | Domain of unknown function (DUF4094)                                                                      | Galactosyltransferase                                                        | 3761          | 3'UTR           |
| miR399        | pen-miR399b                                | pen_U16456                                                                                                         | Pectinesterase                                                                                            | pectinesterase activity                                                      | 2268          | 3'UTR           |
| miR408        | pen-miR408                                 | pen_U31498                                                                                                         | Plastocyanin-like domain                                                                                  | copper ion binding<br>electron carrier activity                              | 430           | 5'UTR           |
|               | pen-miR408a,b,d                            | pen_C6396-1                                                                                                        | Plastocyanin-like domain                                                                                  | copper ion binding<br>electron carrier activity                              | 203           | CDS             |
|               |                                            | pen_C6396-2                                                                                                        |                                                                                                           |                                                                              | 203           | CDS             |
|               | pen-miR408,408a,b,d,e                      | pen_C7900-2                                                                                                        | 56kDa selenium binding protein (SBP56)                                                                    | selenium binding                                                             | 252           | 5'UTR           |
|               | pen-miR408,408a,d,e                        | pen_C7408-1                                                                                                        | Heavy-metal-associated domain<br>P-type ATPase ATP binding domain<br>haloacid dehalogenase-like hydrolase | nucleotide binding<br>metal ion binding                                      | 2814          | CDS             |
|               |                                            | pen_C7408-2                                                                                                        |                                                                                                           |                                                                              | 2786          | CDS             |
| pen-miR408b,d | pen_U15272                                 | Common central domain of tyrosinase<br>Polyphenol oxidase middle domain<br>Protein of unknown function (DUF B2219) | oxidoreductase activity<br>catechol oxidase activity                                                      | 1375                                                                         | 3'UTR         |                 |
|               |                                            | pen_U21649                                                                                                         | -                                                                                                         | -                                                                            | 593           | CDS             |

|         |                  |             |                                                                                                     |                                            |      |       |
|---------|------------------|-------------|-----------------------------------------------------------------------------------------------------|--------------------------------------------|------|-------|
|         |                  | pen_U31467  | -                                                                                                   | -                                          | 1341 | CDS   |
|         |                  | pen_U35485  | Protein of unknown function (DUF B2219)                                                             | catechol oxidase activity                  | 367  | 3'UTR |
|         |                  | pen_C1936-3 | -                                                                                                   | -                                          | 788  | CDS   |
|         |                  | pen_C1936-4 | -                                                                                                   | -                                          | 628  | CDS   |
|         |                  | pen_U7297   | Protein of unknown function (DUF3464)                                                               | -                                          | 638  | CDS   |
| miR414  | pen-miR414       | pen_U7909   | -                                                                                                   | -                                          | 955  | CDS   |
|         |                  | pen_U19831  | DEK C terminal domain                                                                               |                                            | 2988 | CDS   |
|         |                  | pen_U34431  | Leucine rich repeat N-terminal domain<br>Protein tyrosine kinase                                    | protein kinase activity<br>protein binding | 3451 | CDS   |
| miR472  | pen-miR472       | pen_C190-3  | NB-ARC domain                                                                                       | ADP binding                                | 1336 | CDS   |
|         |                  | pen_C2791-1 | Aminomethyltransferase folate-binding domain<br>Glycine cleavage T-protein C-terminal barrel domain | aminomethyltransferase activity            | 1001 | CDS   |
| miR482  | pen-miR482a      | pen_C2791-2 | Glycine cleavage T-protein C-terminal barrel domain                                                 | -                                          | 232  | CDS   |
|         |                  | pen_C2791-3 | -                                                                                                   | -                                          | 232  | CDS   |
|         | pen-miR482a.1,c  | pen_C190-3  | NB-ARC domain                                                                                       | ADP binding                                | 1336 | CDS   |
| miR529  | pen-miR529e      | pen_C2490-1 | F-box domain                                                                                        | protein binding                            | 1272 | 5'UTR |
|         |                  | pen_C2490-2 |                                                                                                     |                                            | 1017 | 5'UTR |
| miR536  | pen-miR536,536c  | pen_C8300-2 | -                                                                                                   | -                                          | 902  | 3'UTR |
|         | pen-miR536c      | pen_U11189  | -                                                                                                   | -                                          | 1707 | CDS   |
| miR902  | pen-miR902a      | pen_U8046   | -                                                                                                   | -                                          | 425  | CDS   |
| miR904  | pen-miR904a      | pen_C7183-1 | Ribosomal protein S27                                                                               | structural constituent of ribosome         | 230  | CDS   |
| miR1063 | pen-miR1063a     | pen_C2103-1 | 60S ribosome biogenesis protein Rrp14                                                               | -                                          | 896  | CDS   |
|         |                  | pen_C2103-2 | Surfeit locus protein 6                                                                             |                                            | 896  | CDS   |
| miR1216 | pen-miR1216      | pen_U15556  | Methyltransferase FkbM domain                                                                       | -                                          | 1790 | CDS   |
| miR1222 | pen-miR1222a     | pen_C3471-1 | Dymeclin                                                                                            | -                                          | 926  | CDS   |
| miR1863 | pen-miR1863b.2   | pen_U34447  | Golgi complex component 7 (COG7)                                                                    | -                                          | 3477 | 3'UTR |
| miR1874 | pen-miR1874      | pen_C9443-1 | PPR repeat                                                                                          | -                                          | 584  | CDS   |
|         |                  | pen_U15736  | PPR repeat                                                                                          | -                                          | 461  | CDS   |
| miR2108 | pen-miR2108a     | pen_U37608  | -                                                                                                   | -                                          | 846  | 3'UTR |
| miR2111 | pen-miR2111      | pen_C3870-2 | -                                                                                                   | -                                          | 113  | CDS   |
|         |                  | pen_U30499  | Sulfite exporter TauE/SafE                                                                          | -                                          | 2115 | 3'UTR |
| miR2118 | pen-miR2118      | pen_C190-3  | NB-ARC domain                                                                                       | ADP binding                                | 1336 | CDS   |
|         | pen-miR2118a,e,p | pen_C168-1  | Protein kinase domain                                                                               | protein kinase activity                    | 2511 | CDS   |
|         |                  | pen_C168-2  |                                                                                                     | ATP binding                                | 1241 | CDS   |

|         |                |              |                                                                                                     |                                         |                                        |       |
|---------|----------------|--------------|-----------------------------------------------------------------------------------------------------|-----------------------------------------|----------------------------------------|-------|
|         |                | pen_C168-3   |                                                                                                     |                                         | 1240                                   | CDS   |
|         | pen-miR2118e,p | pen_C2791-1  | Aminomethyltransferase folate-binding domain<br>Glycine cleavage T-protein C-terminal barrel domain | aminomethyltransferase activity         | 1001                                   | CDS   |
|         |                | pen_C2791-2  | Glycine cleavage T-protein C-terminal barrel domain                                                 | -                                       | 232                                    | CDS   |
|         |                | pen_C2791-3  | -                                                                                                   | -                                       | 232                                    | CDS   |
| miR2673 |                | pen-miR2673a | pen_C1181-1                                                                                         | Protein kinase domain                   | protein kinase activity<br>ATP binding | 1793  |
|         | pen_C1181-2    |              | 1827                                                                                                |                                         |                                        | CDS   |
| miR3509 | pen-miR3509    | pen_C3384-2  | SNARE associated Golgi protein                                                                      | -                                       | 504                                    | 5'UTR |
| miR3948 | pen-miR3948    | pen_C6471-1  | -                                                                                                   | -                                       | 2009                                   | CDS   |
| miR4414 | pen-miR4414    | pen_U23973   | Domain of unknown function (DUF3508)                                                                | -                                       | 188                                    | CDS   |
| miR5021 | pen-miR5021    | pen_U35171   | -                                                                                                   | -                                       | 784                                    | 3'UTR |
| miR5269 | pen-miR5269a   | pen_U16701   | C2 domain                                                                                           | protein binding                         | 2346                                   | 3'UTR |
| miR5298 | pen-miR5298b   | pen_U37595   | Cupin                                                                                               | nutrient reservoir activity             | 1066                                   | 3'UTR |
| miR5562 | pen-miR5562    | pen_U16235   | TOM7 family                                                                                         | -                                       | 336                                    | CDS   |
| miR5673 | pen-miR5673    | pen_U35027   | Uncharacterized ACR, COG1678                                                                        | -                                       | 53                                     | 5'UTR |
| miR5754 | pen-miR5754    | pen_U37701   | APO RNA-binding                                                                                     | RNA binding                             | 1063                                   | CDS   |
| miR5815 | pen-miR5815    | pen_U38123   | bHLH-MYC and R2R3-MYB transcription factors N-terminal                                              | -                                       | 2398                                   | CDS   |
| miR6116 | pen-miR6116    | pen_C3133-3  | -                                                                                                   | -                                       | 1077                                   | CDS   |
|         |                | pen_U15710   | Fructose-bisphosphate aldolase class-I                                                              | fructose-bisphosphate aldolase activity | 612                                    | CDS   |
| miR6463 | pen-miR6463    | pen_U35118   | Phospholipase D-nuclease N-terminal                                                                 | -                                       | 1488                                   | CDS   |
| miR6486 | pen-miR6468    | pen_C3112-1  | -                                                                                                   | -                                       | 819                                    | 3'UTR |
| miR7755 | pen-miR7755    | pen_U2937    | Sir2 family                                                                                         | NAD+ binding                            | 1264                                   | 3'UTR |



pen\_C7409-1

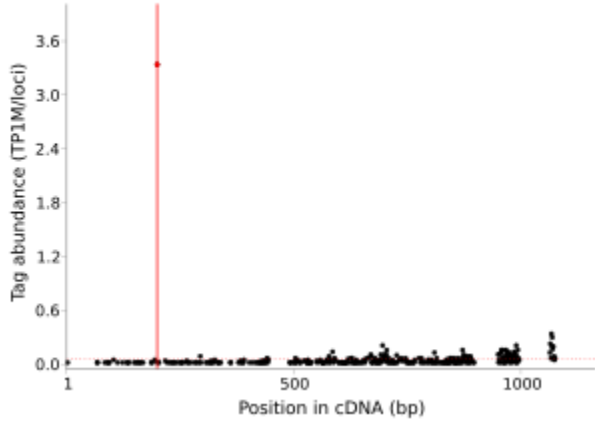

```

pen-miR160c
3' ACCGUAGGUCCUCGGUCCGC 5'
-|||:-|||||
5' GGAGCCAUGAGCCUCCGAGGCGCCAGGGAGCCAGGCACCAUCGCGGAAG 3'
pen_C7409-1
    
```

miR165 / 166

pen\_U34898

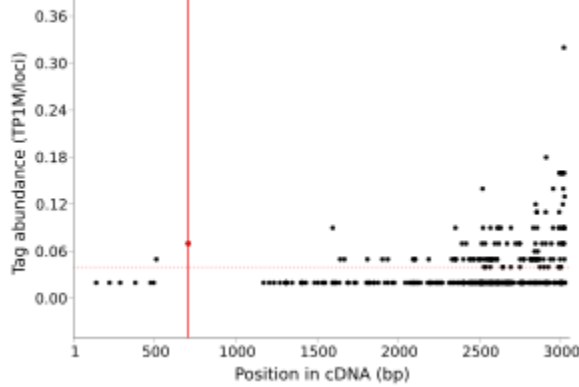

```

pen-miR165a
3' CCCCUACUUCGGACAGGCUU 5'
-|||||
5' GACUGGAUCCAAUAGCCCGGAUGAAGCCUGGUCCGGACUCCAUAGGCAU 3'

pen-miR166a
3' CCCCUACUUCGGACAGGCU 5'
--||:|||||
5' UGACUGGAUCCAAUAGCCCGGAUGAAGCCUGGUCCGGACUCCAUAGGCAU 3'

pen-miR166b
3' UCCUACUUCGGACAGGCU 5'
--||:|||||
5' UGACUGGAUCCAAUAGCCCGGAUGAAGCCUGGUCCGGACUCCAUAGGCAU 3'

pen-miR166c
3' UCCUACUUCGGACAGGCU 5'
-||:|||||
5' GACUGGAUCCAAUAGCCCGGAUGAAGCCUGGUCCGGACUCCAUAGGCAU 3'

pen-miR166d
3' GCCCUACUUCGGACAGGCU 5'
|:-||:|||||
5' UGACUGGAUCCAAUAGCCCGGAUGAAGCCUGGUCCGGACUCCAUAGGCAU 3'

pen-miR166e
3' CCCCUACUUCGGACAGGCU 5'
--||:|||||
5' UGACUGGAUCCAAUAGCCCGGAUGAAGCCUGGUCCGGACUCCAUAGGCAU 3'

pen-miR166g
3' CUCCUACUUCGGACAGGCU 5'
--||:|||||
5' UGACUGGAUCCAAUAGCCCGGAUGAAGCCUGGUCCGGACUCCAUAGGCAU 3'

pen-miR166i
3' CUCCUACUUCGGACUAGGCU 5'
--||:|||||
5' UGACUGGAUCCAAUAGCCCGGAUGAAGCCUGGUCCGGACUCCAUAGGCAU 3'

pen-miR166j
3' CCCUACUUCGGACAGGCU 5'
-||:|||||
5' GACUGGAUCCAAUAGCCCGGAUGAAGCCUGGUCCGGACUCCAUAGGCAU 3'

pen-miR166m
3' UCCUACUUCGGACAGGCU 5'
--||:|||||
5' UGACUGGAUCCAAUAGCCCGGAUGAAGCCUGGUCCGGACUCCAUAGGCAU 3'
pen_U34898
    
```

miR169

pen\_U8300

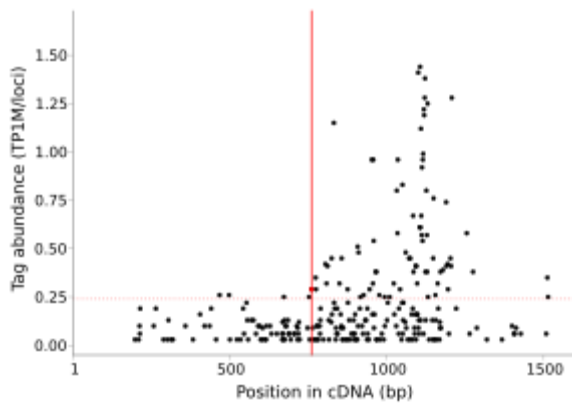

```

pen-miR169t
3' UGUUUAGGUAGGAACCGAU 5'
||||-|-|||
5' CUUUGAUGGAAUUUCCACAAA--CAU-CUUGGCUUAGAAUUUGACUUG 3'
pen_U8300
    
```

miR319

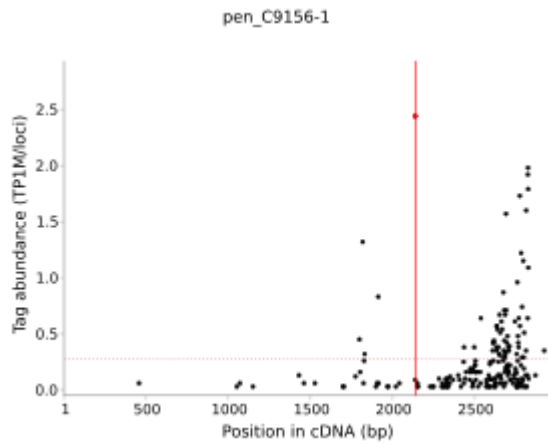

```

pen-miR319
3' CCCUCGAGGGAAGUCAGGUU 5'
-|||-|||||
5' CCCUAGUUUCAUGACA AUGGAA CUCUUCGUC CAAA AUUCCUCAGAA 3'
pen-miR319c
3' CCCUCGAGGGAAGUCAGGUU 5'
-|||-|||||
5' CCCUAGUUUCAUGACA AUGGAA CUCUUCGUC CAAA AUUCCUCAGAA 3'
pen_C9156-1

```

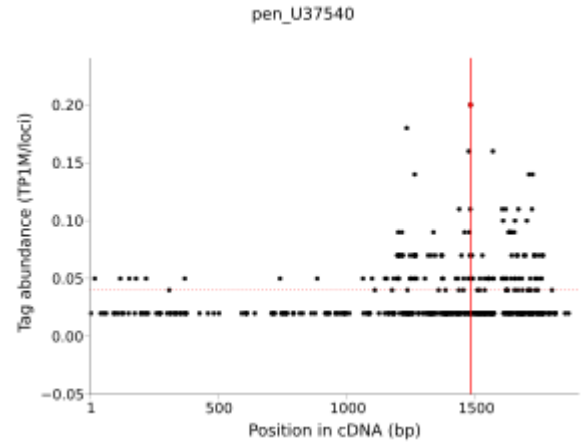

```

pen-miR319d.1
3' AUAACUUGGCUUCCUUCGA 5'
|:-||-||-|||
5' GCCAGUGGCCCCUUUUGUAGAA -CGCAGGAAGCUGCUAUGUUUAGAA 3'
pen_U37540

```

miR390

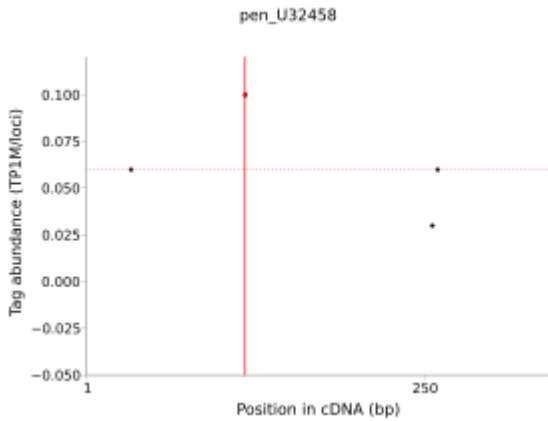

```

pen-miR390a
3' GCGAUAGGGAGGACUCGAA 5'
:|:|:-|||
5' ACCAAUCGCUUUGGCGUGACCCUCCUGACCCUCUAACUUCGAGG 3'
pen_U32458

```

miR391

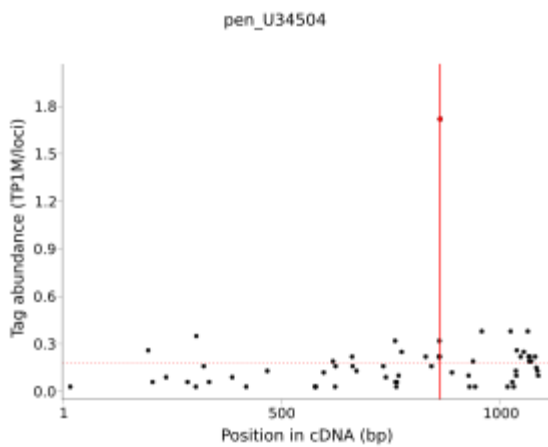

```

pen-miR391
3' ACCGCGAUAGAGAGGACGCUU 5'
|:-|:|||||
5' GCAGCCCUGAAGUCGGUGAUGUUAUCUC -CCUGCGAGGAAAGGAAGAAU 3'
pen_U34504

```











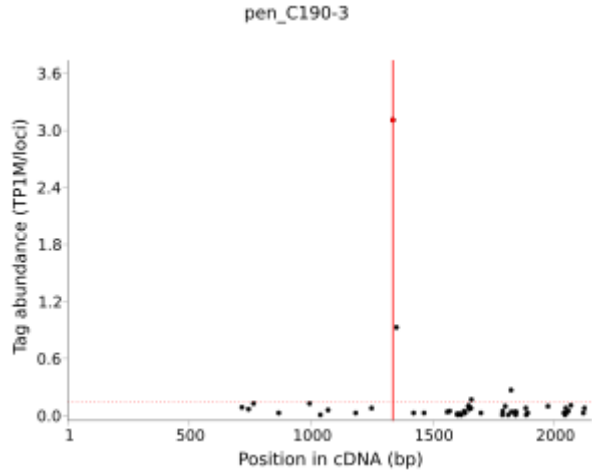

```

pen-miR472
3' AUACCCGCCUUU AUCCUUU 5'
- ||||| - ||||| ||||| : ||
5' GCAGUCCUUCUACAUGGGAUUGGGAGGAAUAGGGGAAGACCACCCUGGCC 3'
pen_C190-3

pen-miR482a.1
3' GUACCAUACCCUCCUU AUCCUUU 5'
||| - ||||| - ||||| ||||| |||||
5' UGGAAGCAGUCCUUCUACAUGGGAUUGGGAGGAAUAGGGGAAGACCACCCUGGCC 3'
pen-miR482c
3' CCUACCCGCCUUU AUCCUUU 5'
|| : ||||| - ||||| ||||| |||||
5' AAGCAGUCCUUCUACAUGGGAUUGGGAGGAAUAGGGGAAGACCACCCUGGCC 3'
pen_C190-3

pen-miR2118
3' GUACCAUACCCUCCUU AUCCUUU 5'
||| - ||||| - ||||| ||||| |||||
5' UGGAAGCAGUCCUUCUACAUGGGAUUGGGAGGAAUAGGGGAAGACCACCCUGGCC 3'
pen_C190-3

```

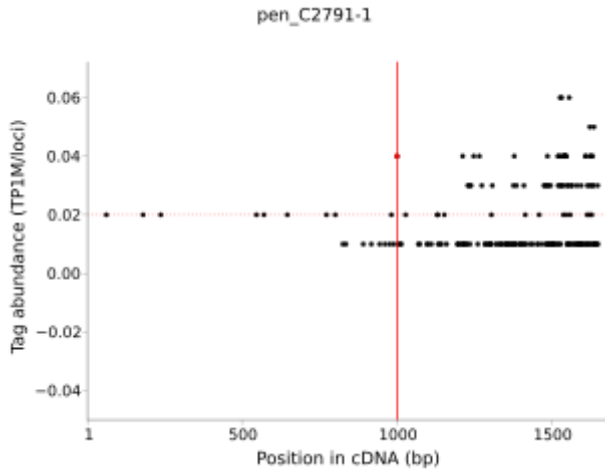

```

pen-miR482a
3' CCUACCCACCGUA ACCUUU 5'
|| - ||||| - ||||| ||||| || - | - |
5' UGCUCUGGAAACA AUAGGCAUUGGCAUUGGUAACAAGGAUCCACGGU 3'
pen_C2791-1

pen-miR2118e
3' AUCCGUACCCACCGUA ACCUUU 5'
||||| ||||| - ||||| ||||| || - | - |
5' AGUGCUCUGGAAACA AUAGGCAUUGGCAUUGGUAACAAGGAUCCACGGU 3'
pen_C2791-1

pen-miR2118p
3' AUCCGUACCCACCGUA ACCUUU 5'
||||| ||||| - ||||| ||||| || - | - |
5' AGUGCUCUGGAAACA AUAGGCAUUGGCAUUGGUAACAAGGAUCCACGGU 3'
pen_C2791-1

```

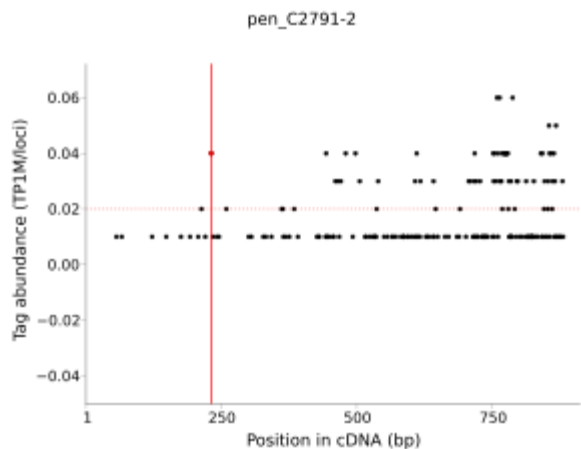

```

pen-miR482a
3' CCUACCCACCGUA ACCUUU 5'
|| - ||||| - ||||| ||||| || - | - |
5' UGCUCUGGAAACA AUAGGCAUUGGCAUUGGUAACAAGGAUCCACGGU 3'
pen_C2791-2

pen-miR2118e
3' AUCCGUACCCACCGUA ACCUUU 5'
||||| ||||| - ||||| ||||| || - | - |
5' AGUGCUCUGGAAACA AUAGGCAUUGGCAUUGGUAACAAGGAUCCACGGU 3'
pen_C2791-2

pen-miR2118p
3' AUCCGUACCCACCGUA ACCUUU 5'
||||| ||||| - ||||| ||||| || - | - |
5' AGUGCUCUGGAAACA AUAGGCAUUGGCAUUGGUAACAAGGAUCCACGGU 3'
pen_C2791-2

```

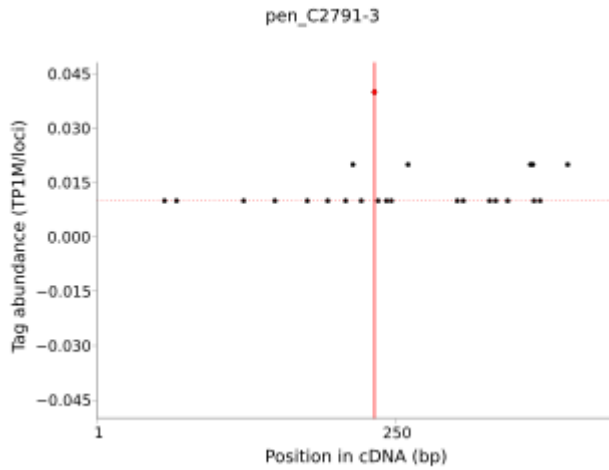

```

pen-miR482a
3' CCUUACCCACCGUAACCUU 5'
  ||-|||---|||-----||-|
5' UGCUCUCUGGAAACAUAAGGCAUGGCGGCAUUGGUACAAGGAUCCACGGU 3'
   pen_C2791-3

pen-miR2118e
3' AUCCGUACCCACCGUAACCUU 5'
  |||-----|||-----||-|
5' AGUGCUCUGGAAACAUAAGGCAUGGCGGCAUUGGUACAAGGAUCCACGGU 3'
   pen_C2791-3

pen-miR2118p
3' AUCCGUACCCACCGUAACCUU 5'
  |||-----|||-----||-|
5' AGUGCUCUGGAAACAUAAGGCAUGGCGGCAUUGGUACAAGGAUCCACGGU 3'
   pen_C2791-3

```

miR529

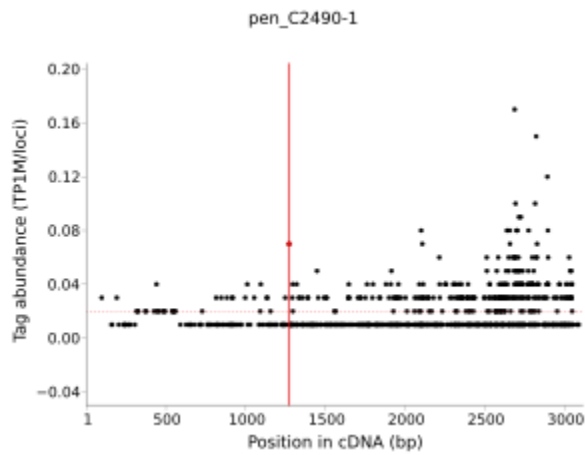

```

pen-miR529e
3' CCCGACAUGAGAGAGAAGA 5'
  |||-----|||-----||-|
5' CUUGGUCUGCAUUAUCGGGCUUCACUCUCUCUUCGUAUUUGUACCGGUU 3'
   pen_C2490-1

```

miR536

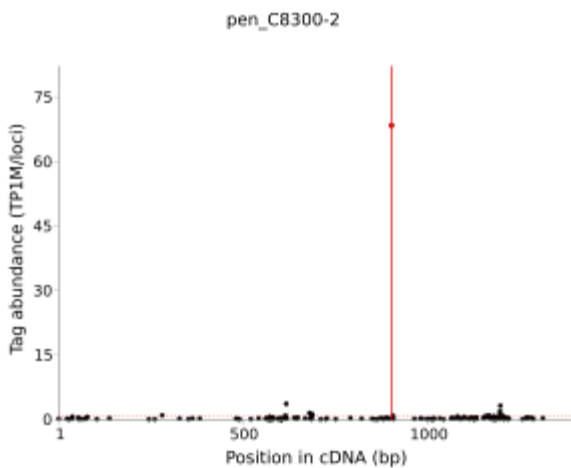

```

pen-miR536
3' CUACGUGUGCGAACUGUGCU 5'
  -|-|||-----|||-----||-|
5' GUGAUUUCUUUGUCUCCAAAGCACACAGCUUGGCACGGAGGUGAGCCGUCU 3'
   pen-miR536c
3' CUUCGUGUUUCGAACCGUGCU 5'
  -|||-----|||-----||-|
5' GUGAUUUCUUUGUCUCCAAAGCACACAGCUUGGCACGGAGGUGAGCCGUCU 3'
   pen_C8300-2

```

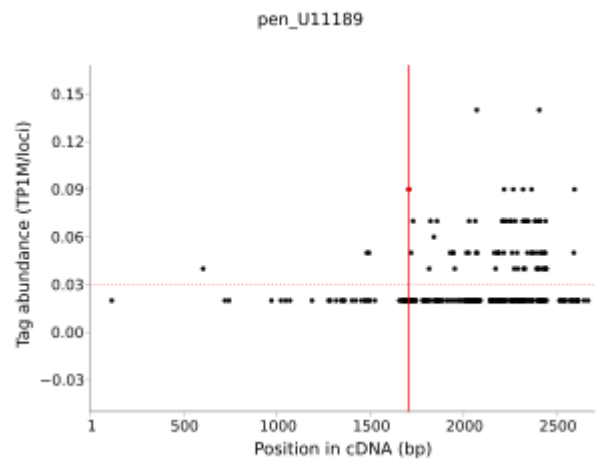

```

pen-miR536c
3' CUUCGUGUUUCGAACCGUGCU 5'
  -|||-----|||-----||-|
5' CCAGAGGACAGAUUGGAAAAGUCCGAAGCUUGGUACGGAGUUUCCACCA 3'
   pen_U11189

```





miR1874

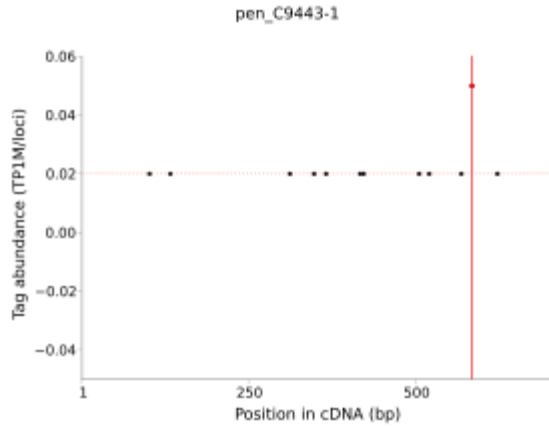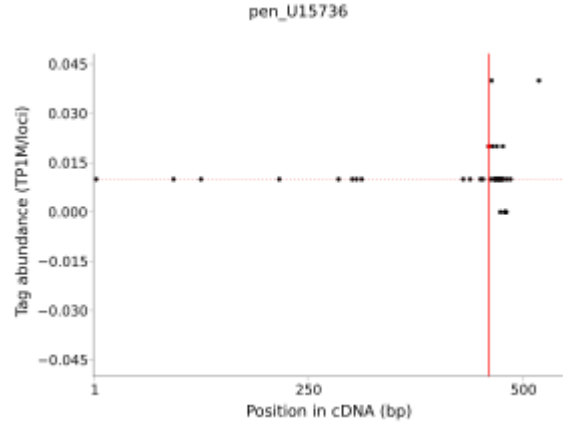

pen-miR1874  
 3' AGACCACAUCGCGGAU 5'  
 |-|-|-|-|-|-|-|-|-|-|  
 5' UUUGAGUUCGACCGCUAUGUGG-GUAAUAGCCUUGUUCACAUUAUAG 3'  
 pen\_C9443-1

pen-miR1874  
 3' AGACCACAUCGCGGAU 5'  
 |-|-|-|-|-|-|-|-|-|-|  
 5' CUGGGAGUCGGAUCUGUUCGUGAGUAGCCUUGUUGACAUGUAUC 3'  
 pen\_U15736

miR2108

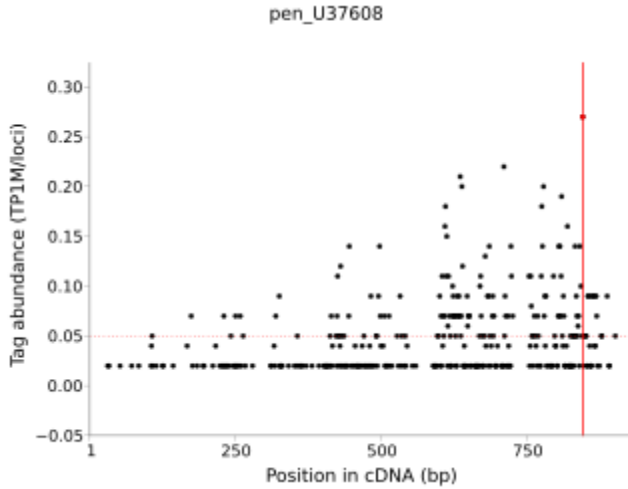

pen-miR2108a  
 3' GUUUGUGGUUGUGUUAUU 5'  
 |-|-|-|-|-|-|-|-|-|-|  
 5' AUGGACUUCUUAACACUCCAAUACCAGCAGAAUUAACAUAUUGUUGA 3'  
 pen\_U37608

miR2111

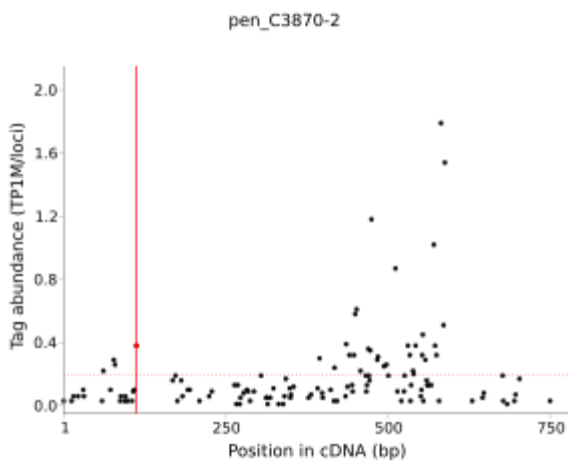

pen-miR2111  
 3' UCAUJAGACGUAGGUCUC 5'  
 |-|-|-|-|-|-|-|-|-|-|  
 5' GUCAGCGUGGACGGAUUAUCAUJUGAAUUCAGAGUUGGGACAAC 3'  
 pen\_C3870-2

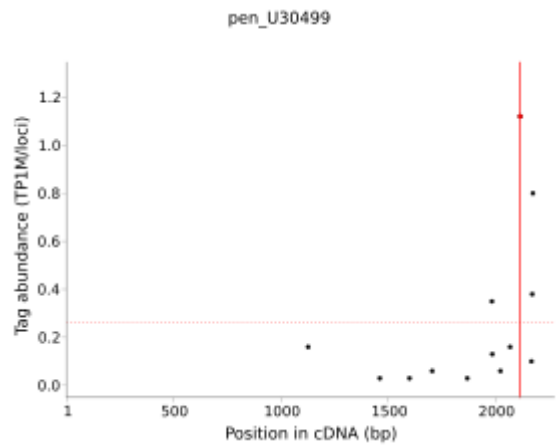

pen-miR2111  
 3' UCAUJAGACGUAGGUCUC 5'  
 :|-|-|-|-|-|-|-|-|-|-|  
 5' CCUUGAUUUGGAAGCUGGGUCAUUGGAUCCAGUGCAAGUCAGGGCCU 3'  
 pen\_U30499





miR3948

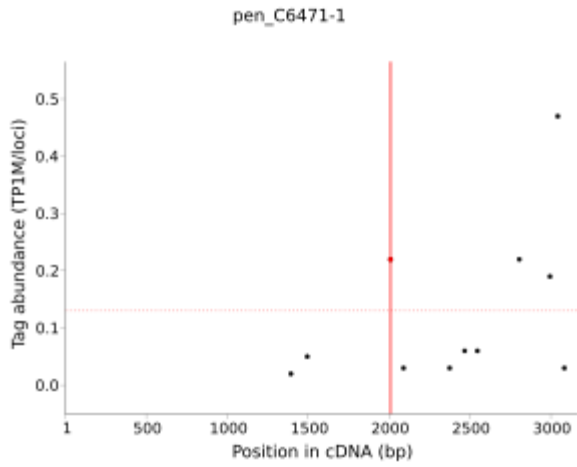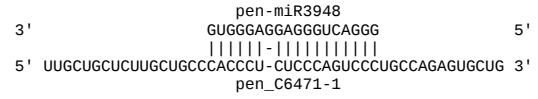

miR4414

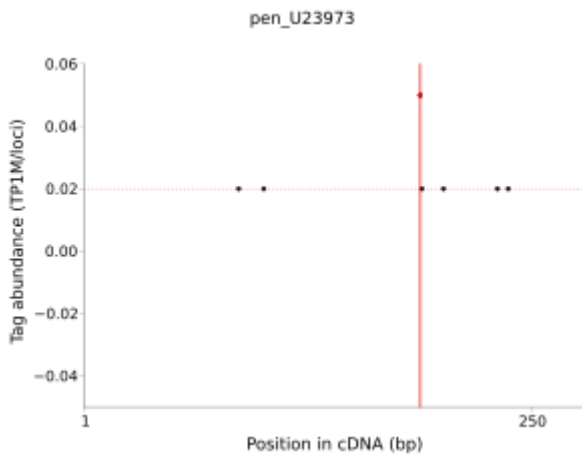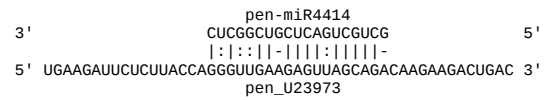

miR5021

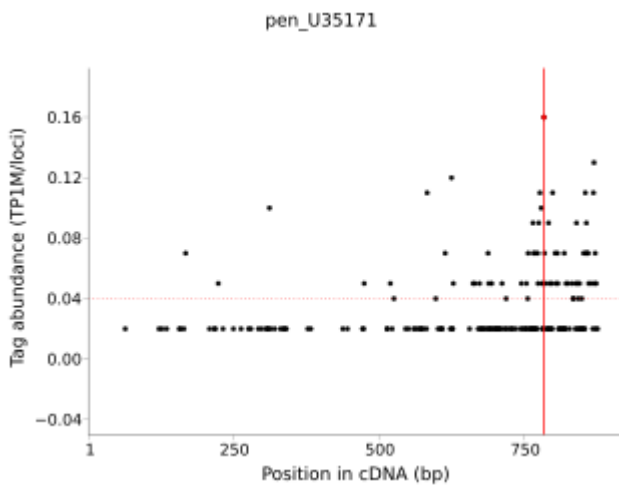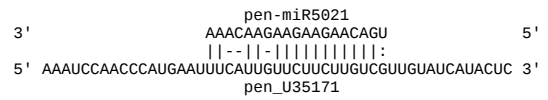

miR5269

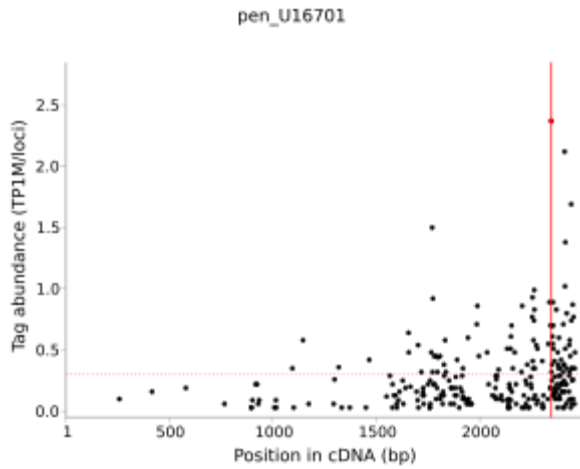

```

pen-miR5269a
3'          AGUUAGAUUAAGGUGGU          5'
   |---|---|---|---|---|---|
5' UUUUAUCCUUUCCUGCUGAAUGAAUUAUCCAUCCAGAUUUAUACGA 3'
           pen_U16701
    
```

miR5298

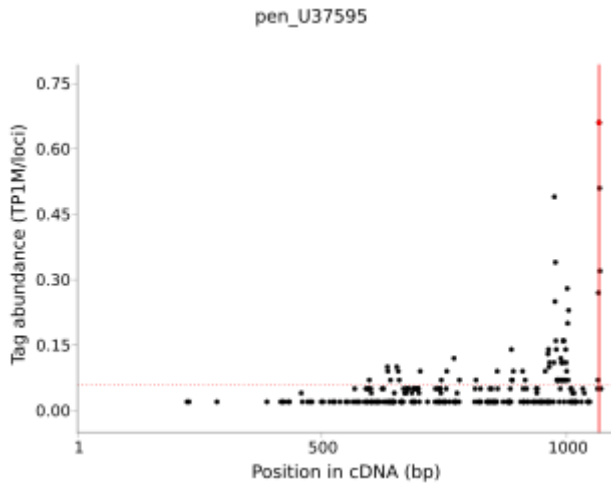

```

pen-miR5298b
3'          UAGUAGAAGUAGAGUAGAG          5'
   |---|---|---|---|---|---|
5' AGAAUAAACGAUCAUGGAUAAUGUUUAUUAUCAUUUCCAUCCAGAUCAUGUU 3'
           pen_U37595
    
```

miR5562

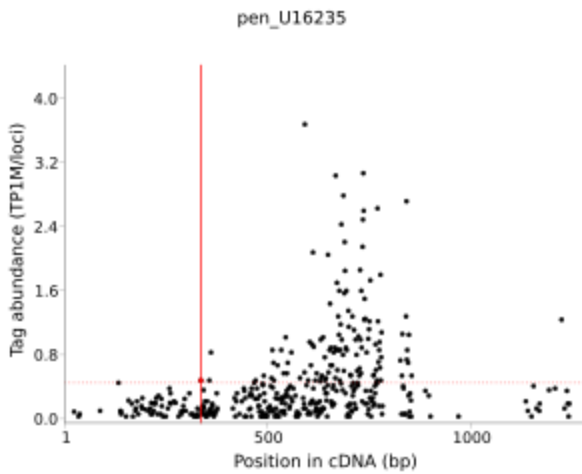

```

pen-miR5562
3'          CAACGUCGGCAGAGUUGUAGUAA          5'
   |---|---|---|---|---|---|
5' GGUGGCCCGCACUGGGUUUCAUCCUCUCAUCAUUAUUGGCAUGCGUU 3'
           pen_U16235
    
```

miR5673

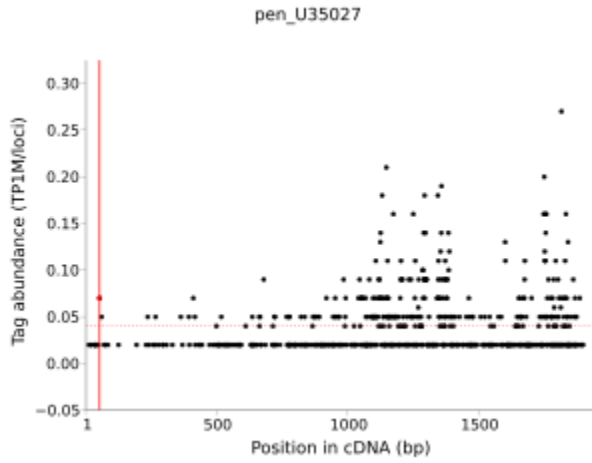

```

pen-miR5673
3'          ACGGAAAGCGCUCUAAGGU          5'
          |--|-----|-----|
5' ACUGGAAGUCCUUCGUUUGCUUUCGC-AGAUUCGAGCGAUUCCCGGCA 3'
          pen_U35027
    
```

miR5754

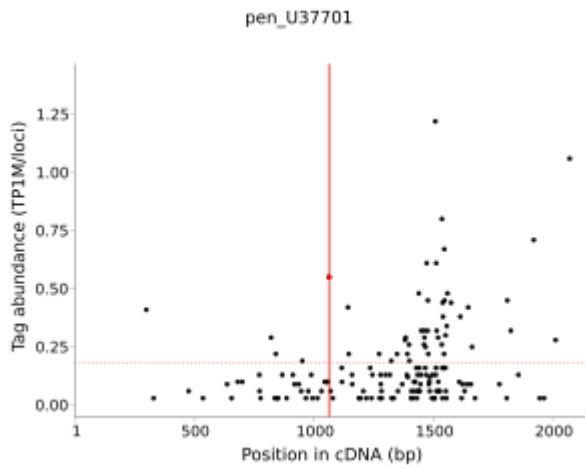

```

pen-miR5754
3'          ACCUUCUAGUCGCUUUAU          5'
          |||-----|-----|
5' AAUUGAAAUGAAACCAUGGAAGAUACAGAGUAGUGGGACAAAGCCCAU 3'
          pen_U37701
    
```

miR5815

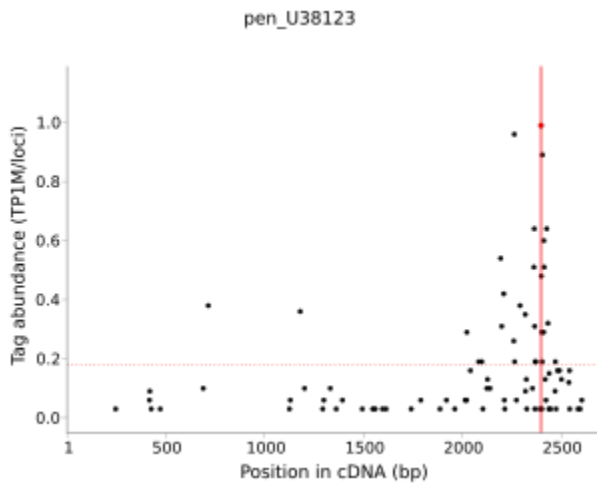

```

pen-miR5815
3'          UCAGUAGAUCACAGGUUAU          5'
          |--|-----|-----|
5' UUGAUCAAGAUGCACUAACUGAUUUAGGUCUCCAUUGGAGAUAGAAAA 3'
          pen_U38123
    
```



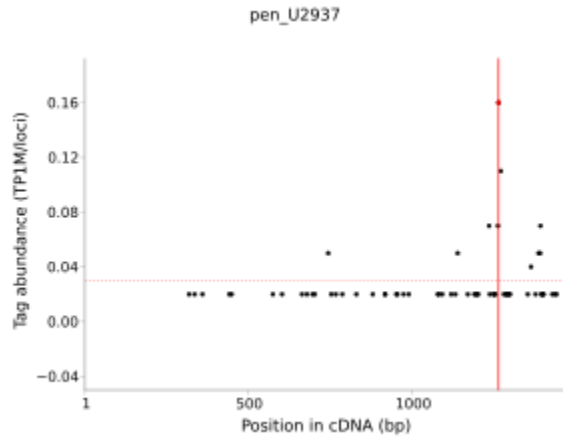

**Table S6** Targets for the novel miRNAs that were identified in *P. endiviifolia* and confirmed by degradome data. Below the table, T-plots for each identified target are presented.

| miRNA family | miRNA species | Target       | Domains                                                                                                                                                                                                             | Molecular function                                                                             | Cleavage site | Cleavage region |
|--------------|---------------|--------------|---------------------------------------------------------------------------------------------------------------------------------------------------------------------------------------------------------------------|------------------------------------------------------------------------------------------------|---------------|-----------------|
|              | a,b,c         | pen_U16671   | -                                                                                                                                                                                                                   | -                                                                                              | 1432          | CDS             |
| pen-miR8156  | a             | pen_U37136   | Armadillo/beta-catenin-like_repeat<br>U-box_domain                                                                                                                                                                  | protein_binding<br>ubiquitin-protein_ligase_activity                                           | 1325          | CDS             |
|              | b             | pen_C1236-1  | NB-ARC_domain                                                                                                                                                                                                       | ADP_binding                                                                                    | 1229          | CDS             |
| pen-miR8158  |               | pen_U7542    | Auxin_response_factor (family)<br>AUX/IAA_family<br>B3_DNA_binding_domain                                                                                                                                           | DNA_binding                                                                                    | 1479          | CDS             |
| pen-miR8159  | a,b           | pen_U15389   | Polyketide_cyclase/_dehydrase_and_lipid_transport<br>(family)                                                                                                                                                       | -                                                                                              | 1346          | 3'UTR           |
|              |               | pen_C3350-1  | -                                                                                                                                                                                                                   | -                                                                                              | 3079          | CDS             |
| pen-miR8164  |               | pen_C4288-3  | Cytochrome_b5-like_Heme/Steroid_binding_domain<br>Oxidoreductase_FAD-binding_domain<br>Oxidoreductase_molybdopterin_binding_domain<br>Oxidoreductase_NAD-binding_domain<br>Mo-co_oxidoreductase_dimerisation_domain | heme_binding<br>electron_carrier_activity<br>oxidoreductase_activity<br>molybdenum_ion_binding | 2282          | CDS             |
|              |               | pen_U7166    | CBS_domain<br>SIS_domain (family)                                                                                                                                                                                   | adenyl_nucleotide_binding<br>carbohydrate_binding                                              | 1290          | CDS             |
| pen-miR8165  |               | pen_U41210   | BRCA1_C_Terminus_(BRCT)_domain (family)                                                                                                                                                                             | -                                                                                              | 1978          | CDS             |
| pen-miR8166  |               | pen_U2587    | AP2_domain                                                                                                                                                                                                          | sequence-specific_DNA_binding_transcription_factor_activity                                    | 242           | CDS             |
| pen-miR8170  |               | pen_U38378   | HAUS_augmin-like_complex_subunit_4 (family)                                                                                                                                                                         | -                                                                                              | 2062          | 3'UTR           |
| pen-miR8171  |               | pen_U30616   | PDZ_domain                                                                                                                                                                                                          | protein_binding                                                                                | 996           | CDS             |
| pen-miR8173  |               | pen_U31475   | NUDIX_domain                                                                                                                                                                                                        | hydrolase_activity                                                                             | 1074          | CDS             |
| pen-miR8176  |               | pen_C11045-1 | TPR_repeat                                                                                                                                                                                                          | -                                                                                              | 448           | CDS             |



miR8159

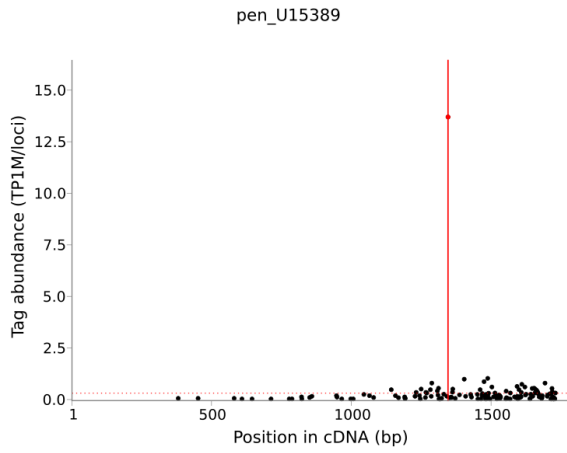

```

UUACCUUGAAGAGUCUGGAAG pen-miR8159a
UUACCUUGAAGAGUCUGGAA pen-miR8159b

pen-miR8159a
3' G AAGGUCUGAGAAGUCCAUU 5'
  |||:|:|||||:|||||:
5' CCCUGCCAGGCCUCAAUUUCUGGACUCUUCAAGGUACUUCGUAAUAGCUC 3'

pen-miR8159b
3' AAGGUCUGAGAAGUCCAUU 5'
  |||:|:|||||:|||||:
5' CCUGCCAGGCCUCAAUUUCUGGACUCUUCAAGGUACUUCGUAAUAGCUC 3'
pen_U15389
    
```

miR8164

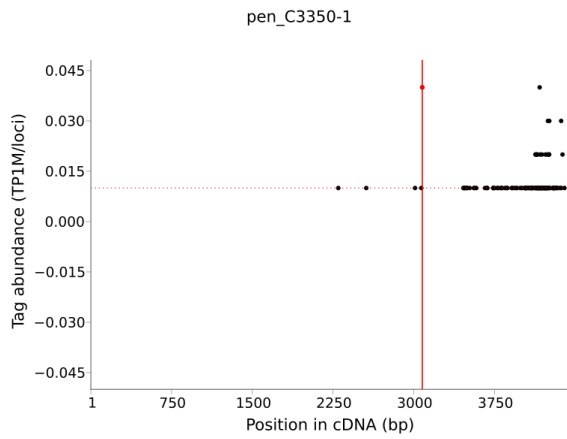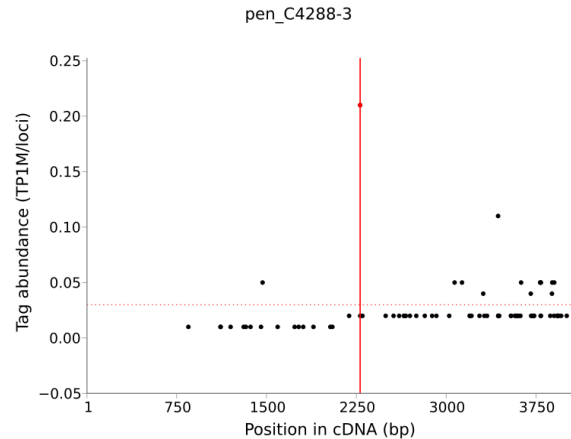

```

pen-miR8164
3' CCCCUCAAACGGUGUUUAAAC 5'
  ||-||:|||||:-|||:|||||:-
5' UUGGGGAGCCUGGCAAAGGAGAGGUUUUGCGACAAAUUUGCUCGAGGGAAAA 3'
pen_C3350-1
    
```

```

pen-miR8164
3' CCCCUCAAACGGUGUUUAAAC 5'
  -||:|||||:-|||:|||||:-
5' CACUCCACUCUGGGCCUGAGAAGUUUGCCAGAAAUUCCCUUAUCUGAAGU 3'
pen_C4288-3
    
```

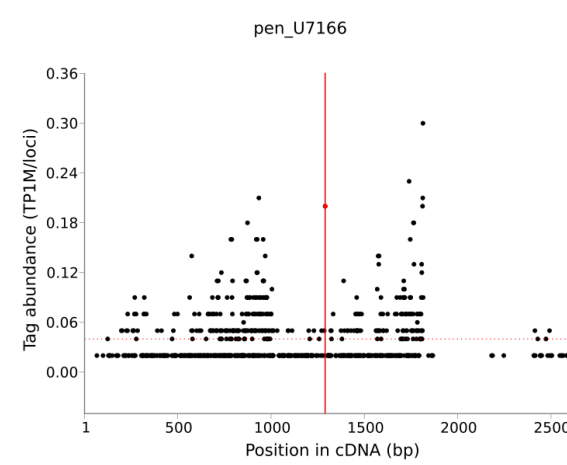

```

pen-miR8164
3' CCCCUCAAACGGUGUUUAAAC 5'
  |||||:-|||:-|||:|||||:-
5' UCUUCAAGAUGUCAGUCGGGAGCUUUGCAACAGAUUACCGAGAACGAUCU 3'
pen_U7166
    
```



miR8165

pen\_U41210

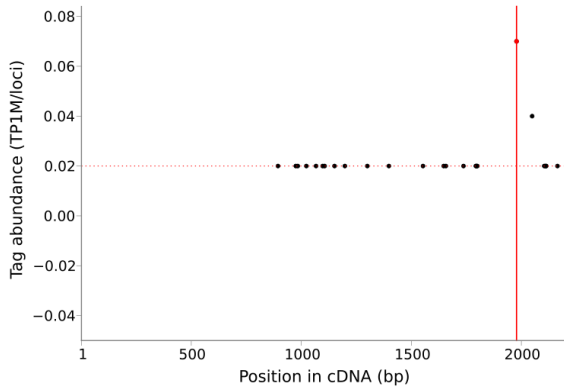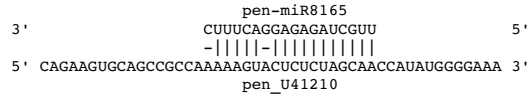

miR8166

pen\_U2587

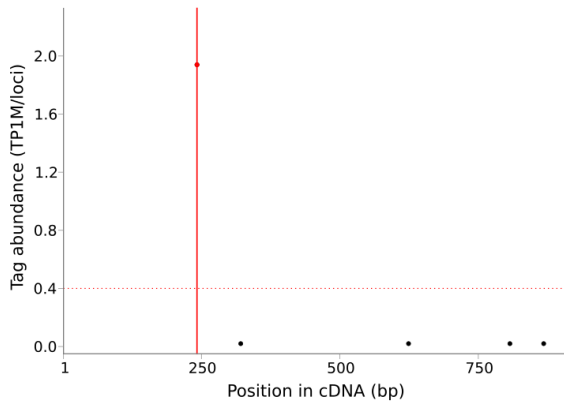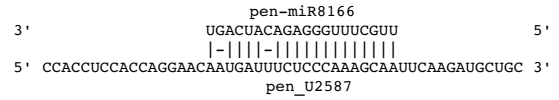

miR8170

pen\_U38378

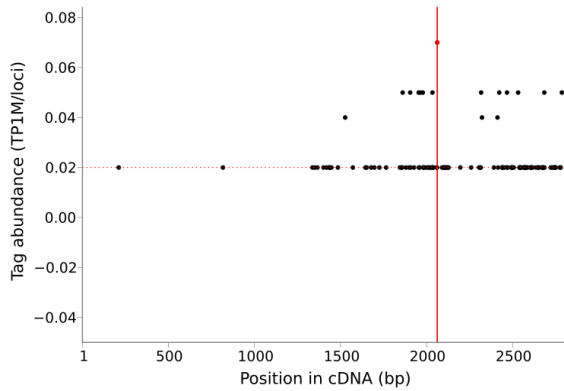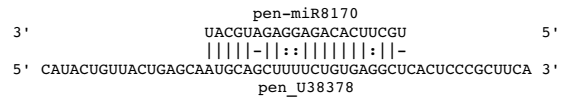



## References:

- Addo-Quaye C, Snyder JA, Park YB, Li YF, Sunkar R, Axtell MJ. 2009.** Sliced microRNA targets and precise loop-first processing of *MIR319* hairpins revealed by analysis of the *Physcomitrella patens* degradome. *RNA* **15(12)**: 2112–2121.
- Altschul SF, Madden TL, Schäffer AA, Zhang J, Zhang Z, Miller W, Lipman DJ. 1997.** Gapped BLAST and PSI-BLAST: a new generation of protein database search programs. *Nucleic Acids Research* **25**: 3389–3402.
- German MA, Luo S, Schroth G, Meyers BC, Green PJ. 2009.** Construction of Parallel Analysis of RNA Ends (PARE) libraries for the study of cleaved miRNA targets and the RNA degradome. *Nature Protocols* **4(3)**: 356–362.
- Kruszka K, Pacak A, Swida-Barteczka A, Stefaniak AK, Kaja E, Sierocka I, Karlowski W, Jarmolowski A, Szweykowska-Kulinska Z. 2013** Developmentally regulated expression and complex processing of barley pri-microRNAs. *BMC Genomics* **14**:34.
- Pant B, Musialak-Lange M, Nuc P, May P, Buhtz A, Kehr J, Walther D, Scheible WR. 2009.** Identification of nutrient-responsive Arabidopsis and rapeseed microRNAs by comprehensive real-time polymerase chain reaction profiling and small RNA sequencing. *Plant Physiology* **150**: 1541-1555.
- Provan J, Murphy S, Maggs CA. 2004.** Universal plastid primers for Chlorophyta and Rhodophyta. *European Journal of Phycology* **39**: 43-50.
- Ruhfel BR, Gitzendanner MA, Soltis PS, Soltis DE, Burleigh JG. 2014.** From algae to angiosperms-infering the phylogeny of green plants (Viridiplantae) from 360 plastid genomes. *BMC Evolutionary Biology* **14**: **23**.
- Sierocka I, Rojek A, Bielewicz D, Karlowski W, Jarmolowski A, Szweykowska-Kulinska Z. 2011.** Novel genes specifically expressed during the development of the male thalli and antheridia in the dioecious liverwort *Pellia endiviifolia*. *Gene* **485**: 53-62.
- Simon L, Lalonde M, Bruns TD. 1992.** Specific amplification of 18S fungal ribosomal genes from vesicular-arbuscular endomycorrhizal fungi colonizing roots. *Applied and Environmental Microbiology* **58**: 291-295.
